# Supplementary material for: First-Principles Calculations of Thermoelectric Transport Properties of Quaternary and Ternary Bulk Chalcogenide Crystals
Source: MDPI journal article supplement (doi:10.3390/ma15082843), 2022-04-13
Supplement: s1 [file s1]

## Article

# First-Principles Calculations of Thermoelectric Transport Properties of Quaternary and Ternary Bulk Chalcogenide Crystals

Sahib Hasan <sup>1,2</sup>, Saro San <sup>1</sup>, Khagendra Baral <sup>1</sup>, Neng Li <sup>3</sup>, Paul Rulis <sup>1</sup> and Wai-Yim Ching <sup>1,\*</sup>

<sup>1</sup> Department of Physics and Astronomy, University of Missouri-Kansas City, Kansas City, MO 64110, USA; sahmvd@mail.umkc.edu (S.H.); ssawcc@mail.umkc.edu (S.S.); kbx67@mail.umkc.edu (K.B.); rulisp@umkc.edu (P.R.)

<sup>2</sup> Department of Sciences, College of Basic Education, Al Muthanna University, Samawah 66001, Iraq

<sup>3</sup> School of Materials Science and Engineering, Wuhan University of Technology, No. 122, Luoshi Road, Wuhan 430070, China; lineng@whut.edu.cn

\* Correspondence: chingw@umkc.edu

**Citation:** Hasan, S.; San, S.; Baral, K.; Li, N.; Rulis, P.; Ching, W.-Y. First-Principles Calculations of Thermoelectric Transport Properties of Quaternary and Ternary Bulk Chalcogenide Crystals. *Materials* **2022**, *15*, 2843. <https://doi.org/10.3390/ma15082843>

Academic Editors: Irena Jankowska-Sumara and Magdalena Krupska-Klimczak

Received: 18 February 2022

Accepted: 9 April 2022

Published: 13 April 2022

**Publisher's Note:** MDPI stays neutral with regard to jurisdictional claims in published maps and institutional affiliations.

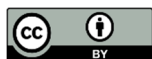

**Copyright:** © 2022 by the authors. Submitted for possible open access publication under the terms and conditions of the Creative Commons Attribution (CC BY) license (<https://creativecommons.org/licenses/by/4.0/>).

# 1. The Supplementary Tables

**Table S1.** The fully optimized structures with the corresponding experimental lattice parameters of 30 chalcogenide crystals.

| #  | Crystal                             | Space group       | Lattice parameters (our calculations)<br>a, b, c(Å), $\alpha$ , $\beta$ , $\gamma$ (degree) | Lattice parameters(experimental)<br>a, b, c(Å), $\alpha$ , $\beta$ , $\gamma$ (degree) |
|----|-------------------------------------|-------------------|---------------------------------------------------------------------------------------------|----------------------------------------------------------------------------------------|
| 1  | Tl <sub>2</sub> CdGeSe <sub>4</sub> | Tet, I-4 2 m(121) | 8.1791, 8.1791, 6.8532, 90.00, 90.00, 90.00                                                 | 8.0145, 8.0145, 6.7234, 90.00, 90.00, 90.00[1]                                         |
| 2  | Tl <sub>2</sub> CdSnSe <sub>4</sub> | Tet, I-4 2 m(121) | 8.2291, 8.2291, 6.9925, 90.00, 90.00, 90.00                                                 | 8.0490, 8.0490, 6.8573, 90.00, 90.00, 90.00[1]                                         |
| 3  | Tl <sub>2</sub> HgSiSe <sub>4</sub> | Tet, I-4 2 m(121) | 8.1599, 8.1599, 6.8546, 90.00, 90.00, 90.00                                                 | 8.0032, 8.0032, 6.6879, 90.00, 90.00, 90.00[2]                                         |
| 4  | Tl <sub>2</sub> HgSnSe <sub>4</sub> | Tet, I-4 2 m(121) | 7.9589, 7.9589, 6.8578, 90.00, 90.00, 90.00                                                 | 7.8571, 7.8571, 6.6989, 90.00, 90.00, 90.00[3]                                         |
| 5  | CuBS <sub>2</sub>                   | Tet, I-42d(122)   | 5.0203, 5.0203, 9.0696, 90.00, 90.00, 90.00                                                 | 5.044, 5.044, 8.948056, 90.00, 90.00, 90.00[4]                                         |
| 6  | CuBSe <sub>2</sub>                  | Tet, I-42d(122)   | 5.3328, 5.3328, 9.7364, 90.00, 90.00, 90.00                                                 | 5.782, 5.782, 11.4021, 90.00, 90.00, 90.00[4]                                          |
| 7  | CuBTe <sub>2</sub>                  | Tet, I-42d(122)   | 5.7218, 5.7218, 10.7973, 90.00, 90.00, 90.00                                                | 5.616, 5.616, 10.6479, 90.00, 90.00, 90.00[4]                                          |
| 8  | AuBSe <sub>2</sub>                  | Tet, I-42d(122)   | 5.6726, 5.6726, 9.6556, 90.00, 90.00, 90.00                                                 | 5.676, 5.676, 9.6776, 90.00, 90.00, 90.00[5]                                           |
| 9  | AuBTe <sub>2</sub>                  | Tet, I-42d(122)   | 5.9911, 5.9911, 10.8396, 90.00, 90.00, 90.00                                                | 6.011, 6.011, 10.7897, 90.00, 90.00, 90.00[5]                                          |
| 10 | AuAlTe <sub>2</sub>                 | Tet, I-42d(122)   | 6.3156, 6.3156, 12.3673, 90.00, 90.00, 90.00                                                | 6.244, 6.244, 12.5692, 90.00, 90.00, 90.00[5]                                          |
| 11 | AuGaTe <sub>2</sub>                 | Tet, I-42d(122)   | 6.3232, 6.3232, 12.4756, 90.00, 90.00, 90.00                                                | 6.2990, 6.2990, 12.4720, 90.00, 90.00, 90.00[5]                                        |
| 12 | AuInTe <sub>2</sub>                 | Tet, I-42d(122)   | 6.5064, 6.5064, 13.0550, 90.00, 90.00, 90.00                                                | 6.4840, 6.4840, 12.9745, 90.00, 90.00, 90.00[5]                                        |
| 13 | CuAlSe <sub>2</sub>                 | Tet, I-42d(122)   | 5.6526, 5.6526, 11.1557, 90.00, 90.00, 90.00                                                | 5.602, 5.602, 10.944, 90.00, 90.00, 90.00[6]                                           |
| 14 | CuAlTe <sub>2</sub>                 | Tet, I-42d(122)   | 6.0944, 6.0944, 12.1101, 90.00, 90.00, 90.00                                                | 5.964, 5.964, 11.780, 90.00, 90.00, 90.00[6]                                           |
| 15 | AgAlSe <sub>2</sub>                 | Tet, I-42d(122)   | 6.0324, 6.0324, 11.1150, 90.00, 90.00, 90.00                                                | 5.95, 5.95, 10.7457, 90.00, 90.00, 90.00[7]                                            |
| 16 | AgAlTe <sub>2</sub>                 | Tet, I-42d(122)   | 6.4134, 6.4134, 12.2311, 90.00, 90.00, 90.00                                                | 6.29, 6.29, 11.8252, 90.00, 90.00, 90.00[7]                                            |
| 17 | CuGaS <sub>2</sub>                  | Tet, I-42d(122)   | 5.3824, 5.3824, 10.6673, 90.00, 90.00, 90.00                                                | 5.347, 5.347, 10.974, 90.00, 90.00, 90.00[8]                                           |
| 17 | CuGaSe <sub>2</sub>                 | Tet, I-42d(122)   | 5.6782, 5.6782, 11.2749, 90.00, 90.00, 90.00                                                | 5.607, 5.607, 10.990, 90.00, 90.00, 90.00[8]                                           |
| 19 | CuGaTe <sub>2</sub>                 | Tet, I-42d(122)   | 6.0999, 6.0999, 12.1799, 90.00, 90.00, 90.00                                                | 5.994, 5.994, 11.912, 90.00, 90.00, 90.00[8]                                           |
| 20 | AgGaS <sub>2</sub>                  | Tet, I-42d(122)   | 5.7803, 5.7803, 10.6678, 90.00, 90.00, 90.00                                                | 5.755, 5.755, 10.283, 90.00, 90.00, 90.00[8]                                           |
| 21 | AgGaSe <sub>2</sub>                 | Tet, I-42d(122)   | 6.0507, 6.0507, 11.2857, 90.00, 90.00, 90.00                                                | 5.985, 5.985, 10.901, 90.00, 90.00, 90.00[8]                                           |
| 22 | AgGaTe <sub>2</sub>                 | Tet, I-42d(122)   | 6.4089, 6.4089, 12.3514, 90.00, 90.00, 90.00                                                | 6.301, 6.301, 11.962, 90.00, 90.00, 90.00[8]                                           |

|    |                     |                 |                                              |                                              |
|----|---------------------|-----------------|----------------------------------------------|----------------------------------------------|
| 23 | CuInS <sub>2</sub>  | Tet, I-42d(122) | 5.594, 5.594, 11.273, 90.00, 90.00, 90.00    | 5.522, 5.522, 11.132, 90.00, 90.00, 90.00[8] |
| 24 | CuInSe <sub>2</sub> | Tet, I-42d(122) | 5.879, 5.879, 11.829, 90.00, 90.00, 90.00    | 5.785, 5.785, 11.570, 90.00, 90.00, 90.00[8] |
| 25 | CuInTe <sub>2</sub> | Tet, I-42d(122) | 6.302, 6.302, 12.648, 90.00, 90.00, 90.00    | 6.179, 6.179, 12.360, 90.00, 90.00, 90.00[8] |
| 26 | AgInS <sub>2</sub>  | Tet, I-42d(122) | 5.936, 5.936, 11.567, 90.00, 90.00, 90.00    | 5.827, 5.827, 11.190, 90.00, 90.00, 90.00[8] |
| 27 | AgInSe <sub>2</sub> | Tet, I-42d(122) | 6.197, 6.197, 12.123, 90.00, 90.00, 90.00    | 6.098, 6.098, 11.708, 90.00, 90.00, 90.00[8] |
| 28 | AgInTe <sub>2</sub> | Tet, I-42d(122) | 6.571, 6.571, 13.021, 90.00, 90.00, 90.00    | 6.443, 6.443, 12.636, 90.00, 90.00, 90.00[8] |
| 29 | NaInSe <sub>2</sub> | Tet, I-42d(122) | 6.7103, 6.7103, 11.2860, 90.00, 90.00, 90.00 | 6.418, 6.418, 12.644, 90.00, 90.00, 90.00[9] |
| 30 | NaInTe <sub>2</sub> | Tet, I-42d(122) | 7.1943, 7.1943, 12.2738, 90.00, 90.00, 90.00 | 6.599, 6.599, 12.276, 90.00, 90.00, 90.00[9] |

**Table S2.** Energy gap (Eg) (calculated in our previous works), the Seebeck coefficients (S) and figure of merit (ZT) as a function of chemical potential at room temperature (300 K), and the TBOD for these 30 chalcogenide crystals. In the previous published works (Refs. 79 and 80 in the main text), OLCAO code was used to calculate the energy band gap. Spin-Orbit Coupling (SOC) effect was not included in the calculations.

| #  | Crystal                             | Eg(eV)   | S(μV/K) | S(μV/K)             | Highest ZT | TBOD (e-/Å <sup>3</sup> ) |
|----|-------------------------------------|----------|---------|---------------------|------------|---------------------------|
| 1  | Tl <sub>2</sub> CdGeSe <sub>4</sub> | 0.814(D) | 1300    | —                   | 1.01       | 0.0085                    |
| 2  | Tl <sub>2</sub> CdSnSe <sub>4</sub> | 0.810(D) | 1250    | —                   | 1.0        | 0.0080                    |
| 3  | Tl <sub>2</sub> HgSiSe <sub>4</sub> | 0.992(D) | 1500    | —                   | 1.02       | 0.0067                    |
| 4  | Tl <sub>2</sub> HgSnS <sub>4</sub>  | 1.105(D) | 1660    | —                   | 1.0        | 0.0066                    |
| 5  | CuBS <sub>2</sub>                   | 1.8(D)   | 2600    | 2295[4]             | 1.01       | 0.0363                    |
| 6  | CuBSe <sub>2</sub>                  | 1.6(D)   | 2500    | 2527[4]             | 1.02       | 0.0293                    |
| 7  | CuBTe <sub>2</sub>                  | 1.2(D)   | 1800    | 1704[4]             | 1.0        | 0.0250                    |
| 8  | AuBSe <sub>2</sub>                  | 1.78(ID) | 925     | —                   | 0.96       | 0.0228                    |
| 9  | AuBTe <sub>2</sub>                  | 1.40(ID) | 825     | —                   | 0.98       | 0.0202                    |
| 10 | AuAlTe <sub>2</sub>                 | 1.60(D)  | 600     | —                   | 0.94       | 0.0151                    |
| 11 | AuGaTe <sub>2</sub>                 | 0.646(D) | 205     | —                   | 0.60       | 0.0144                    |
| 12 | AuInTe <sub>2</sub>                 | 0.635(D) | 190     | —                   | 0.54       | 0.0125                    |
| 13 | CuAlSe <sub>2</sub>                 | 1.20(D)  | 1600    | —                   | 1.0        | 0.0209                    |
| 14 | CuAlTe <sub>2</sub>                 | 1.70(ID) | 1800    | —                   | 1.0        | 0.0182                    |
| 15 | AgAlSe <sub>2</sub>                 | 1.45(D)  | 2050    | —                   | 1.005      | 0.0170                    |
| 16 | AgAlTe <sub>2</sub>                 | 1.81(D)  | 1900    | —                   | 1.01       | 0.0149                    |
| 17 | CuGaS <sub>2</sub>                  | 0.80(D)  | 850     | —                   | 0.96       | 0.0234                    |
| 18 | CuGaSe <sub>2</sub>                 | 0.39(D)  | 700     | —                   | 0.82       | 0.0198                    |
| 19 | CuGaTe <sub>2</sub>                 | 0.85(D)  | 550     | —                   | 0.90       | 0.0176                    |
| 20 | AgGaS <sub>2</sub>                  | 1.05(D)  | 1100    | —                   | 1.01       | 0.0185                    |
| 21 | AgGaSe <sub>2</sub>                 | 0.60(D)  | 480     | —                   | 0.90       | 0.0160                    |
| 22 | AgGaTe <sub>2</sub>                 | 0.90(D)  | 500     | 860[10]             | 0.91       | 0.0144                    |
| 23 | CuInS <sub>2</sub>                  | 0.240(D) | 390     | 370[11]             | 0.84       | 0.0191                    |
| 24 | CuInSe <sub>2</sub>                 | 0.146(D) | 260     | 240[11]             | 0.70       | 0.0166                    |
| 25 | CuInTe <sub>2</sub>                 | 0.754(D) | 460     | 325[11],<br>00[12]  | 0.88       | 0.0153                    |
| 26 | AgInS <sub>2</sub>                  | 0.651(D) | 770     | —                   | 0.98       | 0.0152                    |
| 27 | AgInSe <sub>2</sub>                 | 0.453(D) | 390     | —                   | 0.84       | 0.0135                    |
| 28 | AgInTe <sub>2</sub>                 | 1.001(D) | 525     | 500[13],<br>750[14] | 0.92       | 0.0125                    |
| 29 | NaInSe <sub>2</sub>                 | 1.54(D)  | 2400    | —                   | 1.01       | 0.0111                    |
| 30 | NaInTe <sub>2</sub>                 | 1.80(D)  | 2100    | —                   | 1.02       | 0.00942                   |

## 2. The Supplementary Figures

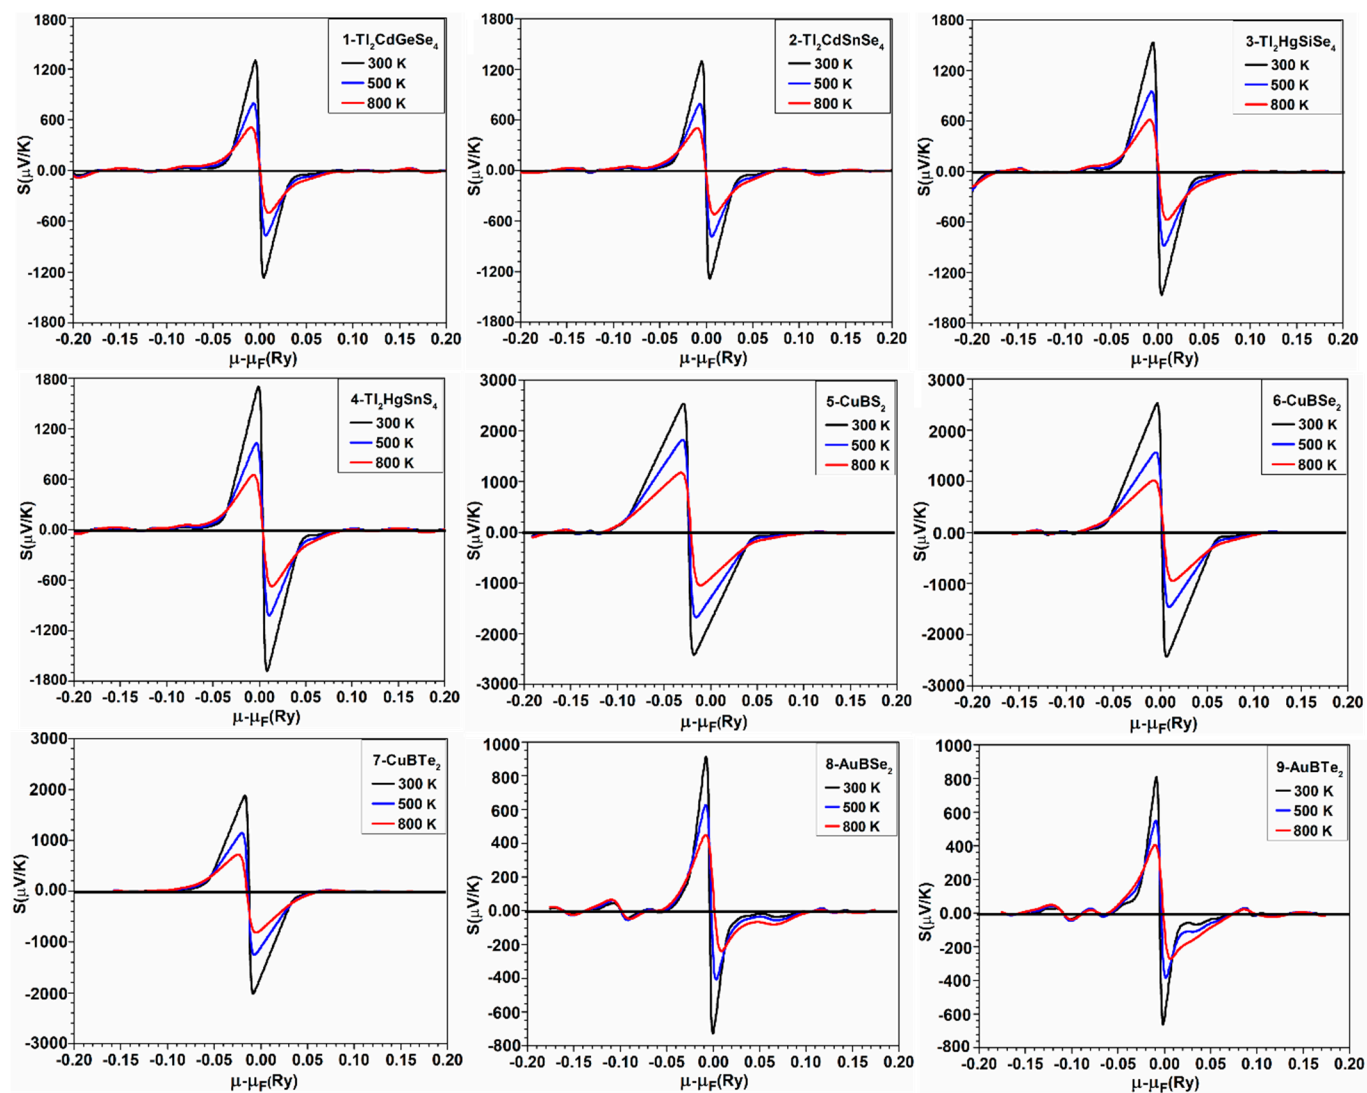

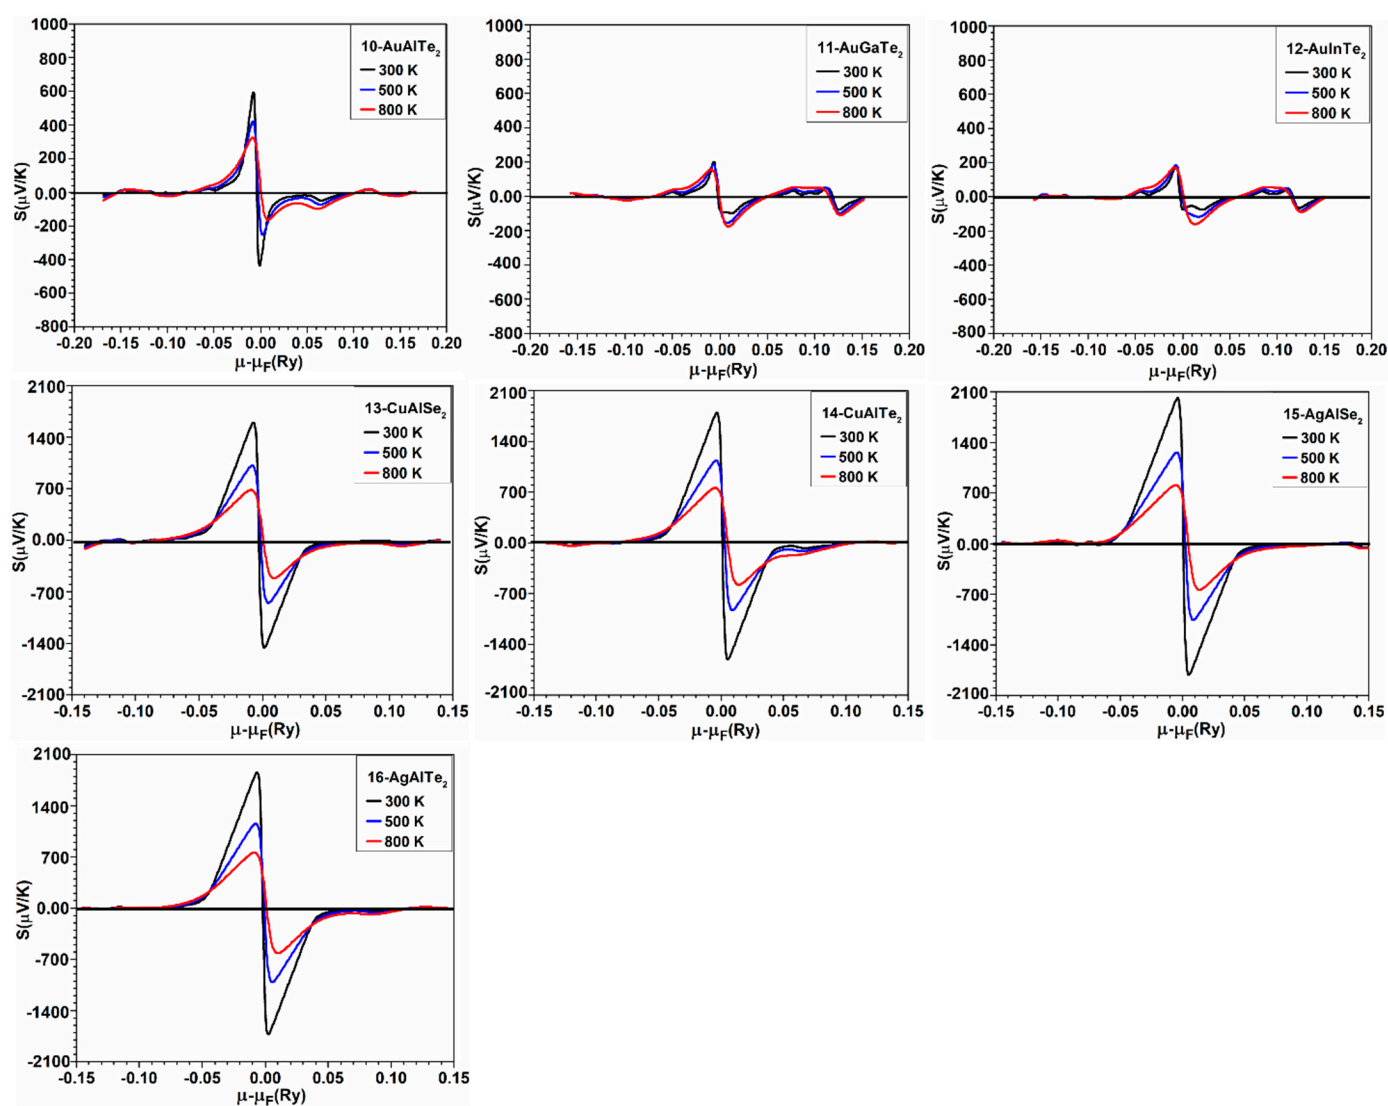

**Figure S1.** Calculated Seebeck coefficient( $S$ ) versus the chemical potential for the crystals from 1-Tl<sub>2</sub>CdGeS<sub>4</sub> to 16-AgAlTe<sub>2</sub>.

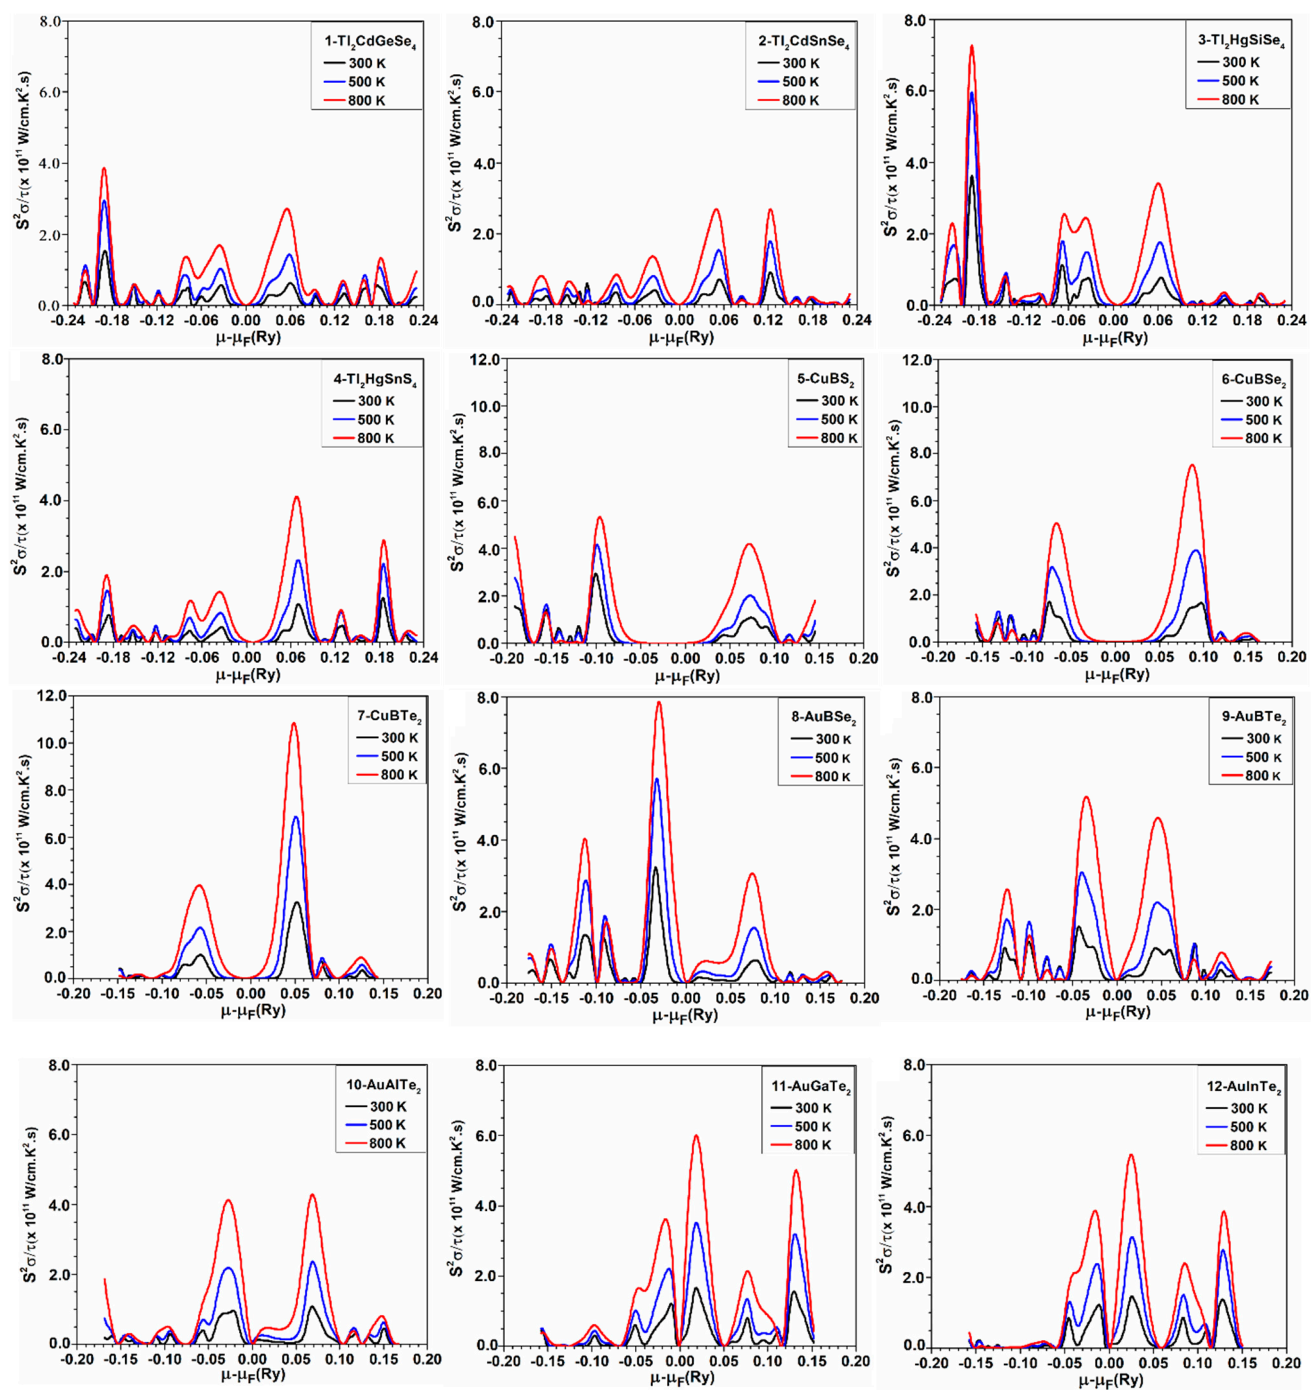

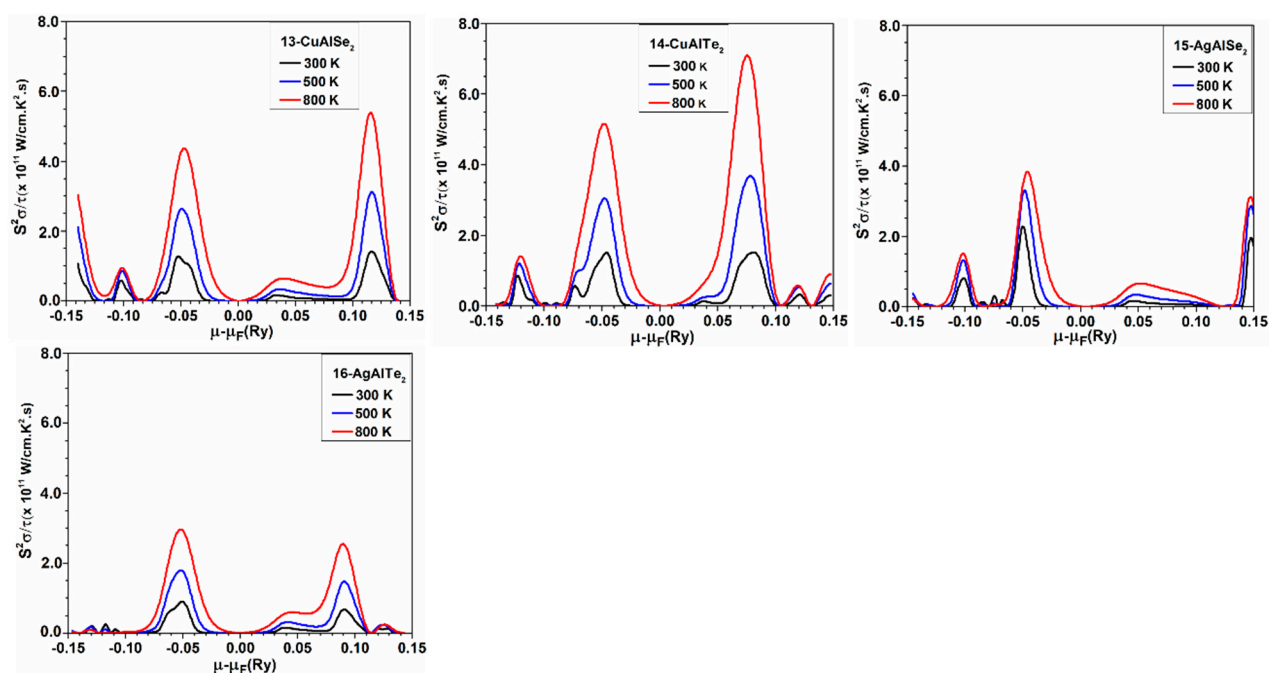

**Figure S2.** Calculated PF versus the chemical potential for the crystals from 1-TlCdGeS<sub>4</sub> to 16-AgAlTe<sub>2</sub>.

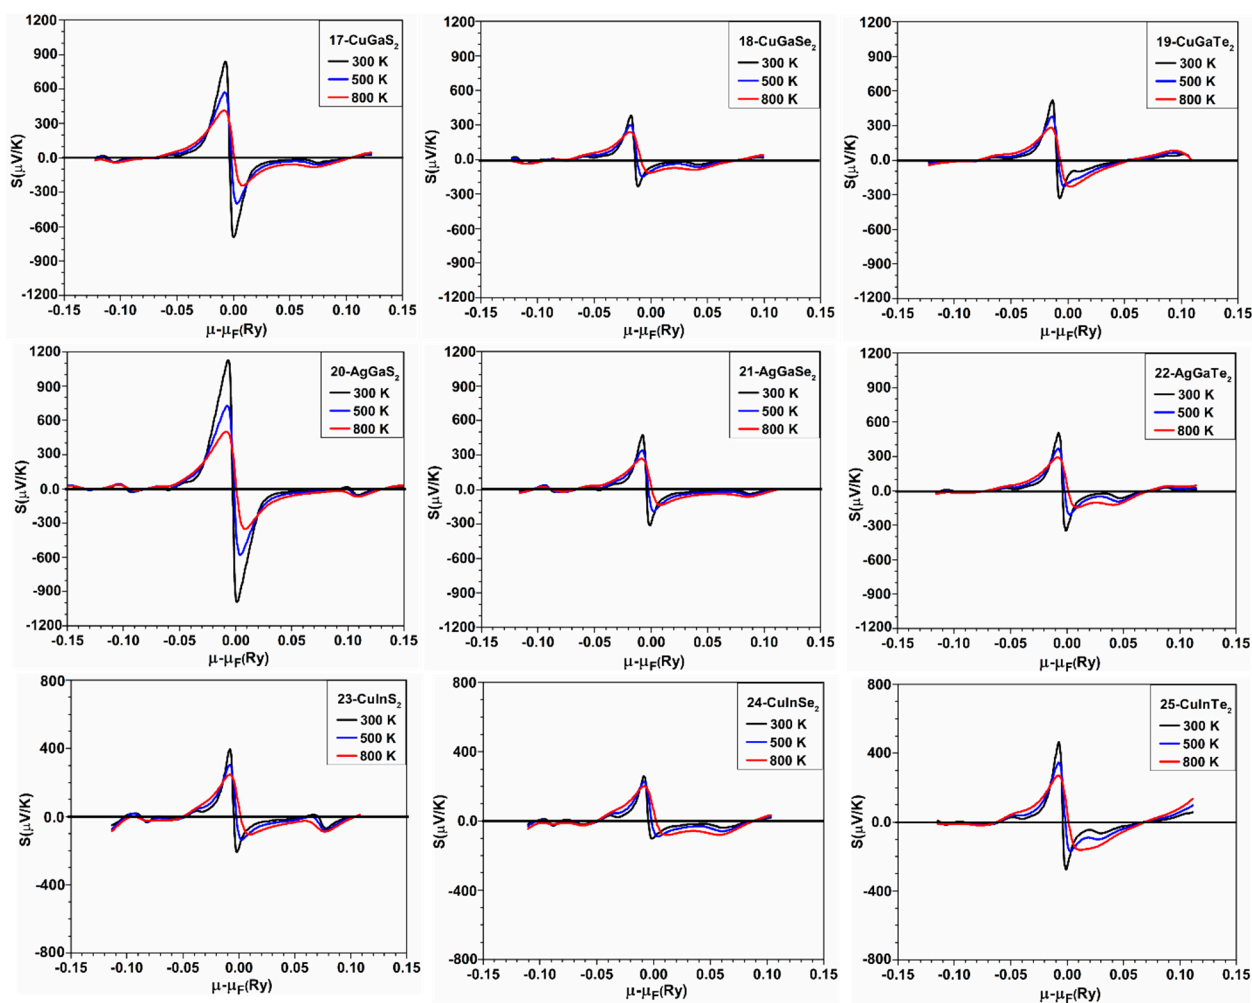

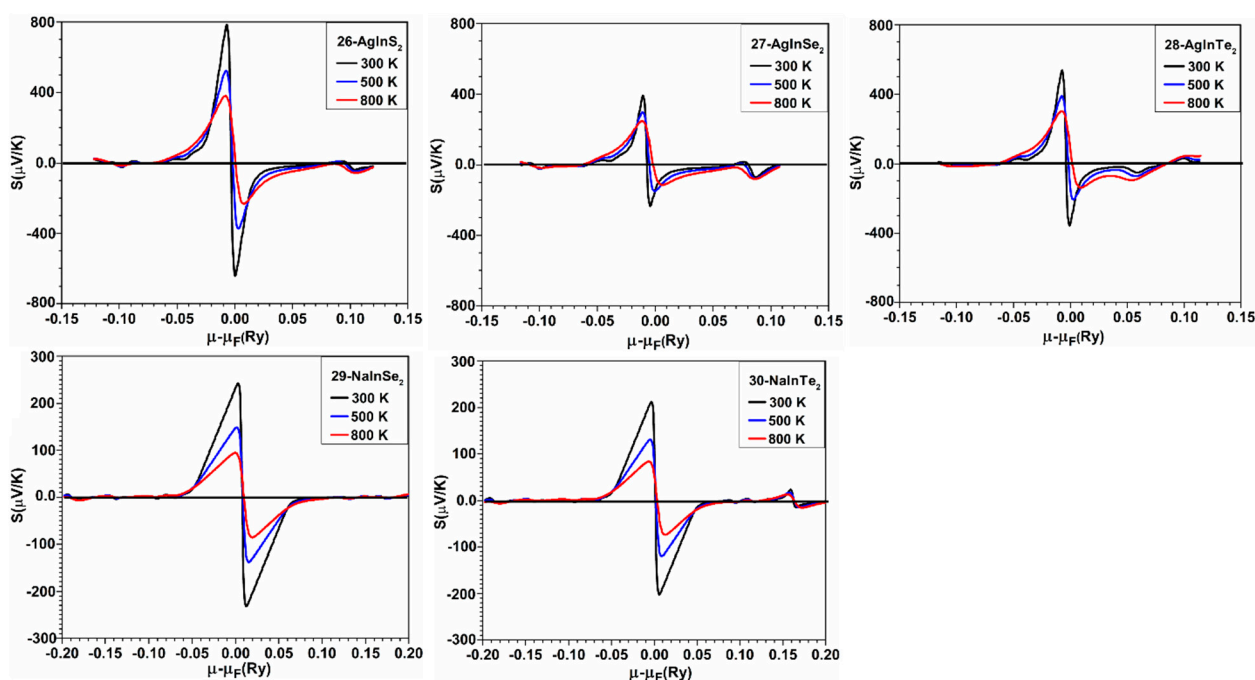

**Figure S3.** Calculated Seebeck coefficient( $S$ ) versus the chemical potential for the crystals from 17-CuGaS<sub>2</sub> to 30-NaInTe<sub>2</sub>.

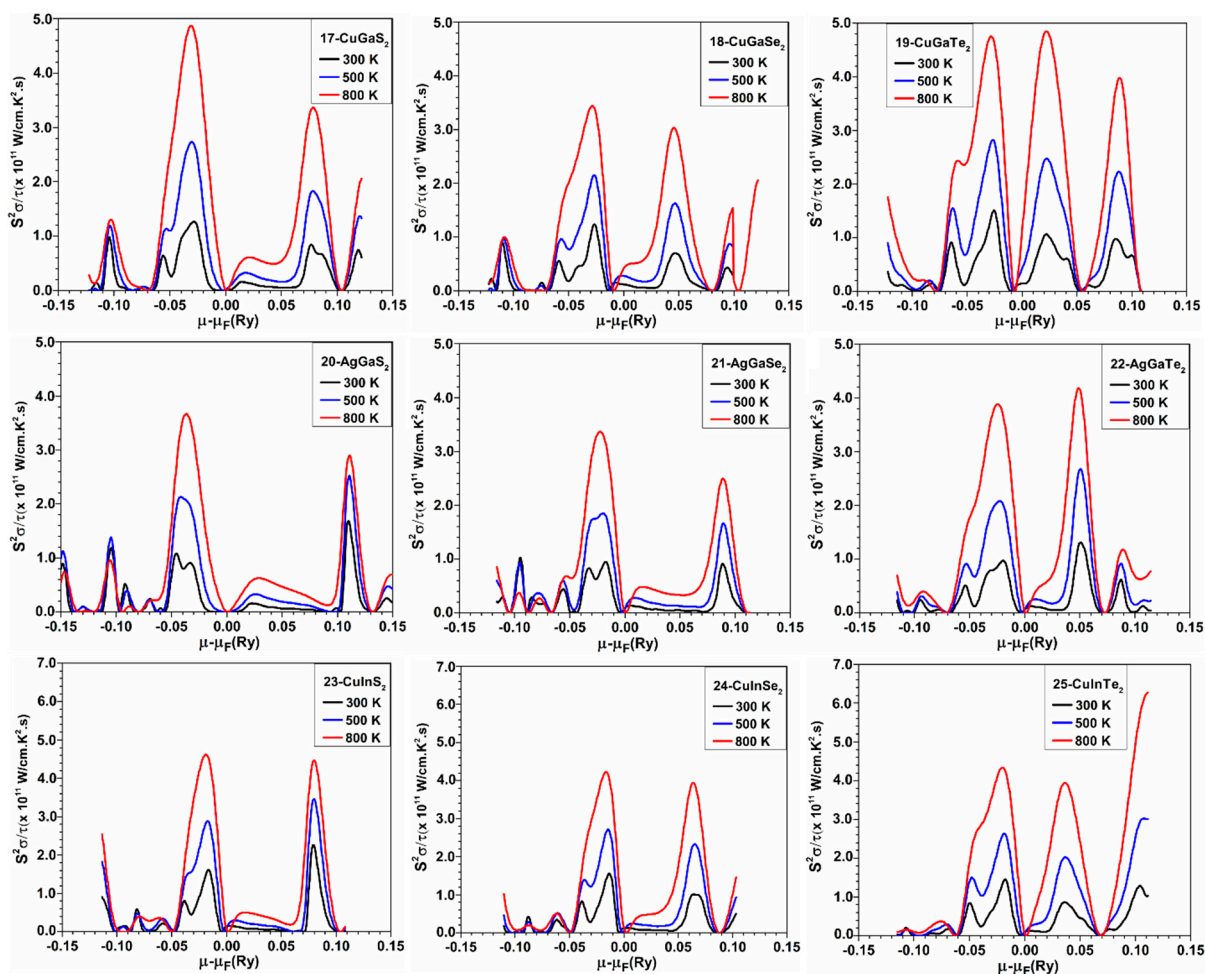

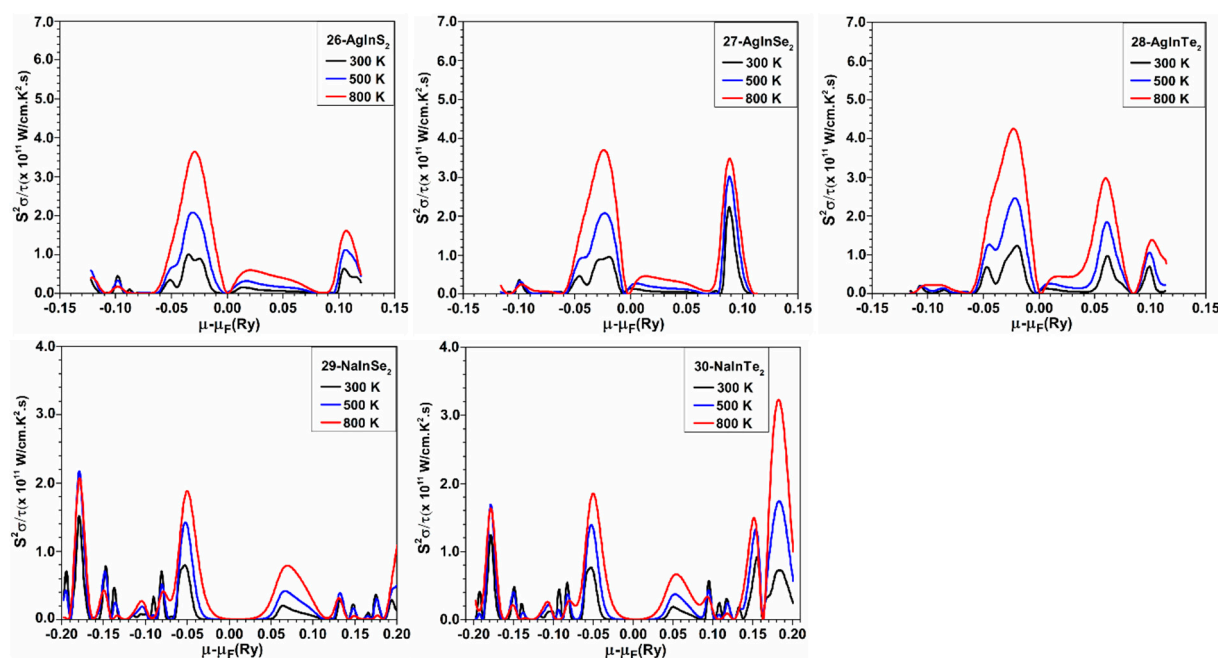

Figure S4. Calculated PF versus the chemical potential for the crystals from 17-CuGaS<sub>2</sub> to 30-NaInTe<sub>2</sub>.

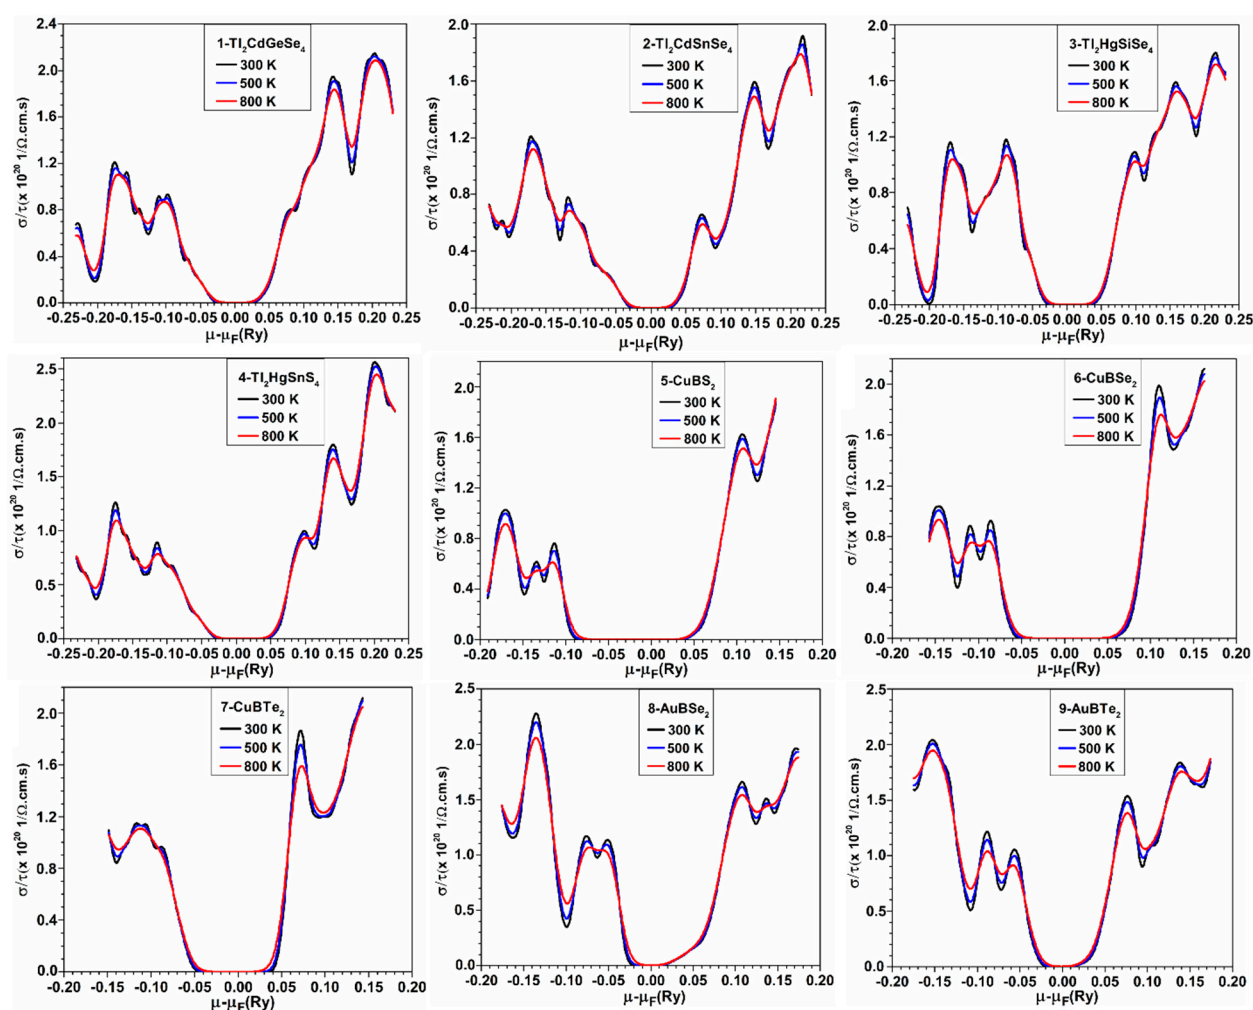

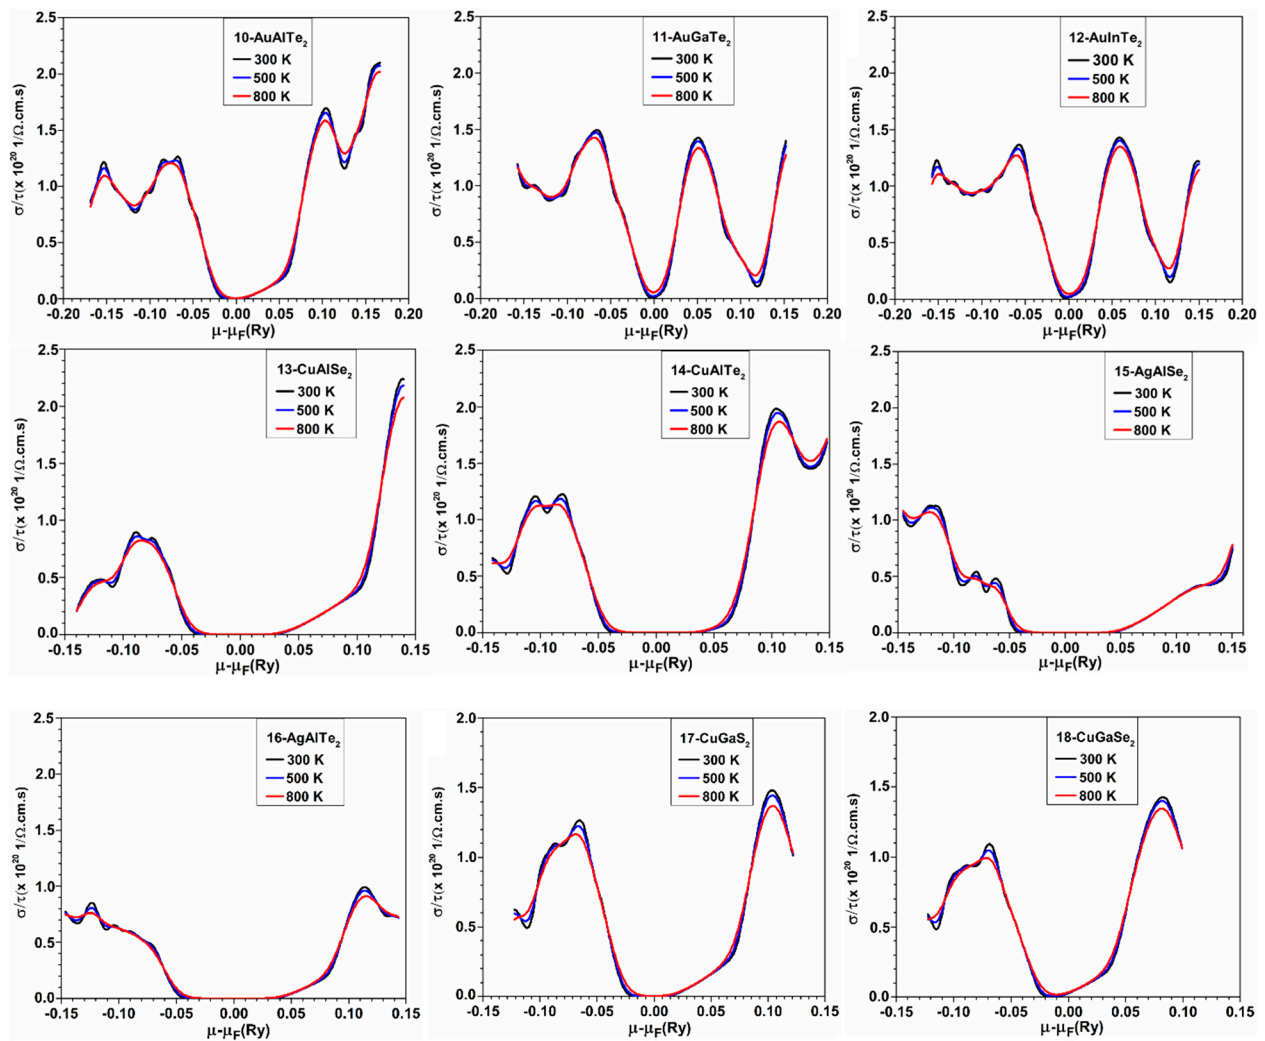

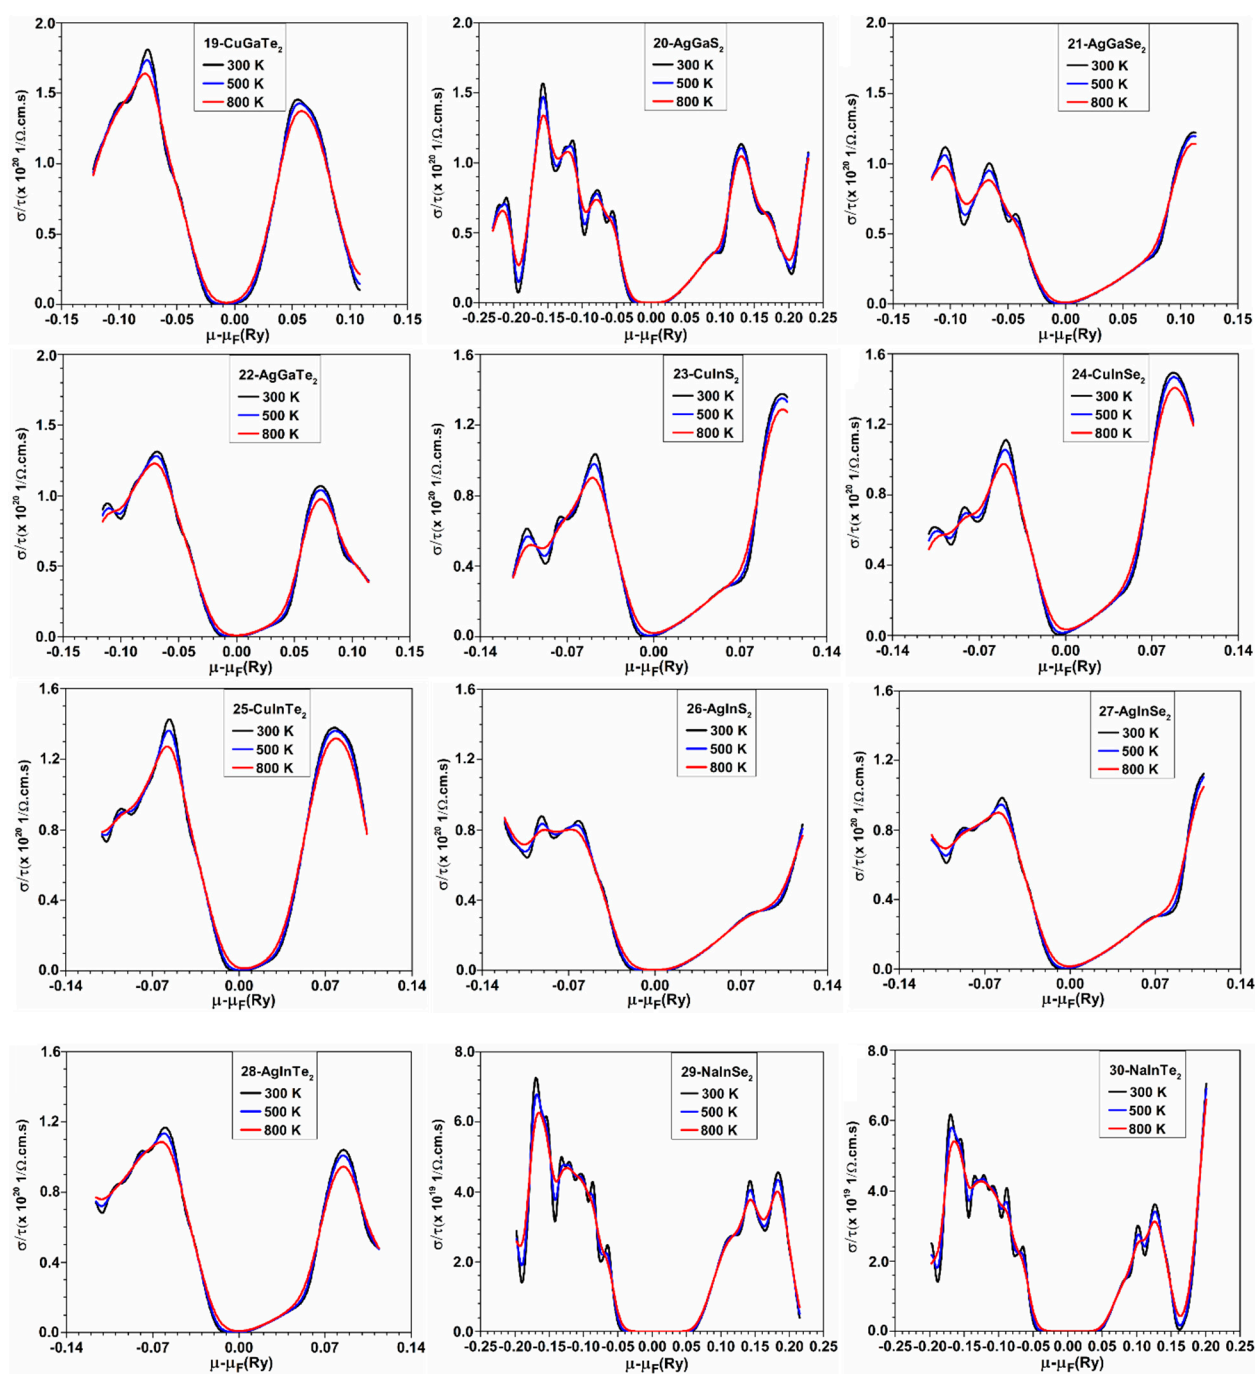

Figure S5. Calculated  $\sigma/\tau$  versus the chemical potential for the 30 crystals.

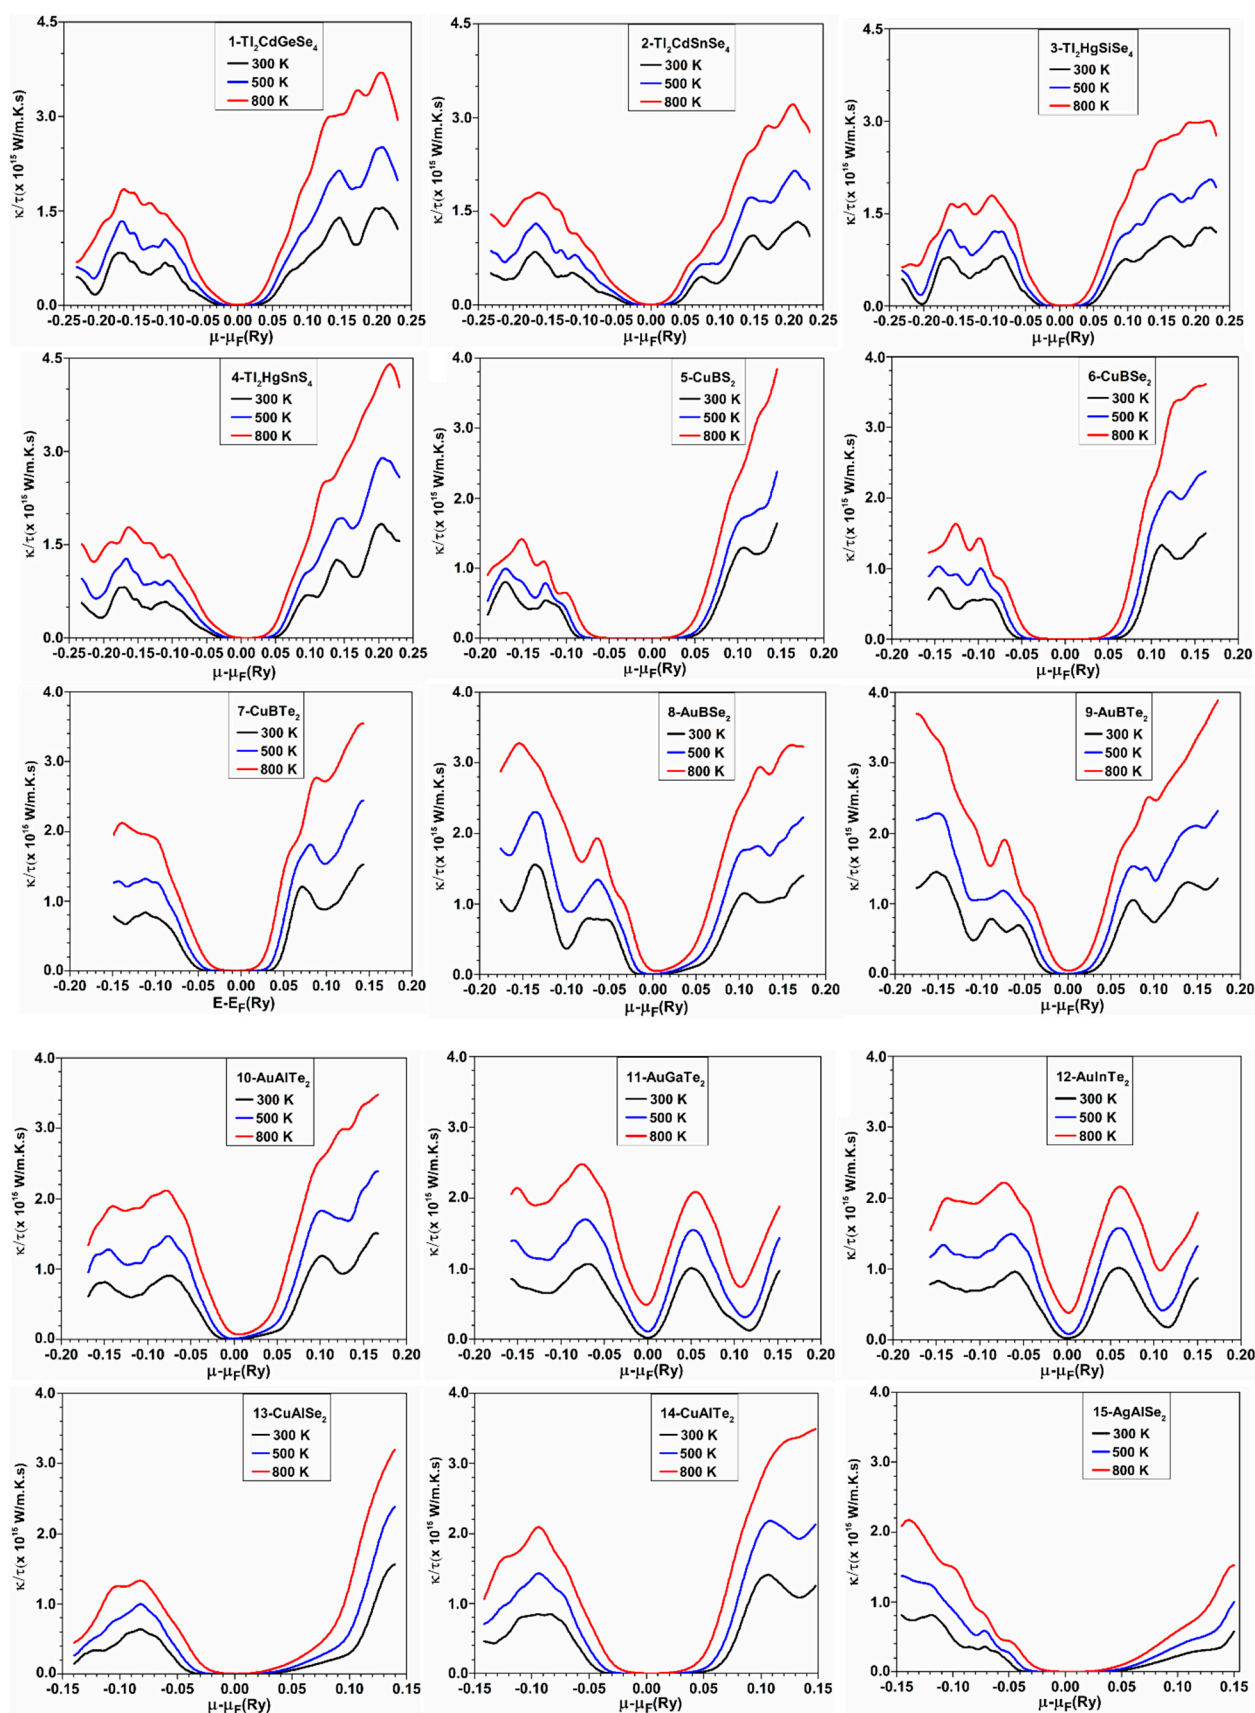

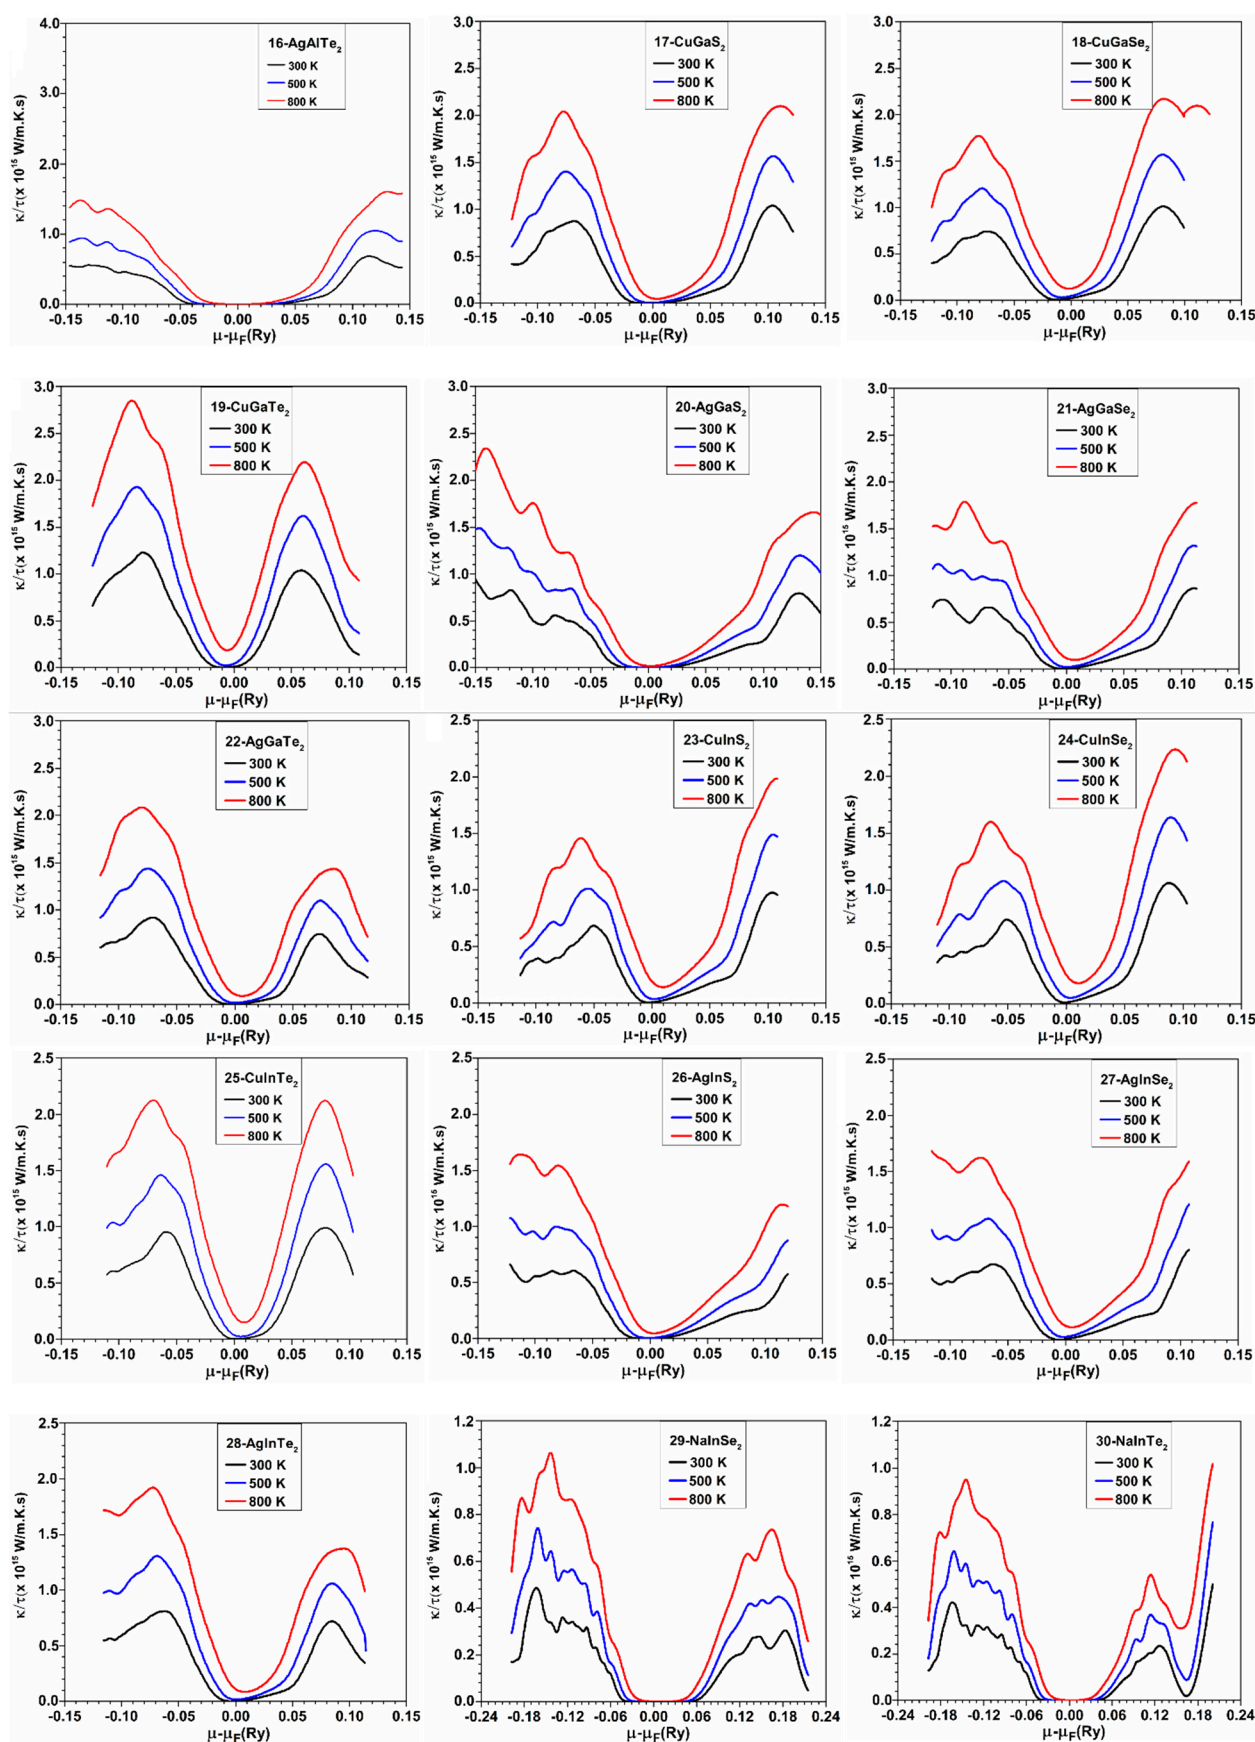

Figure S6. Calculated  $\kappa/\tau$  versus the chemical potential for the 30 crystals.

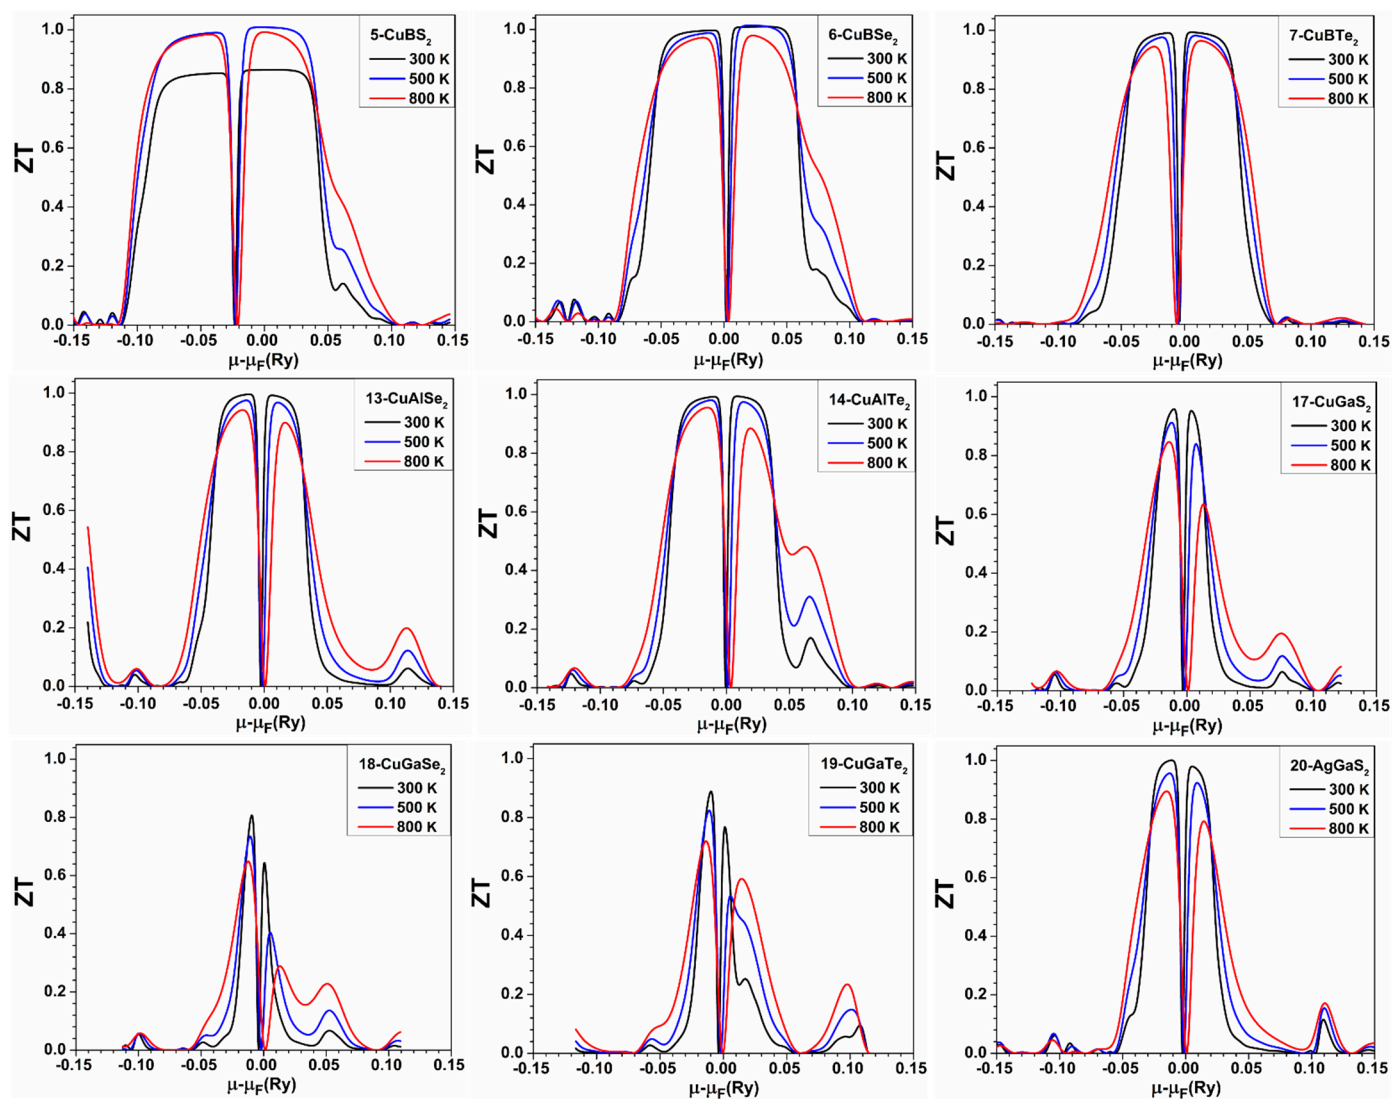

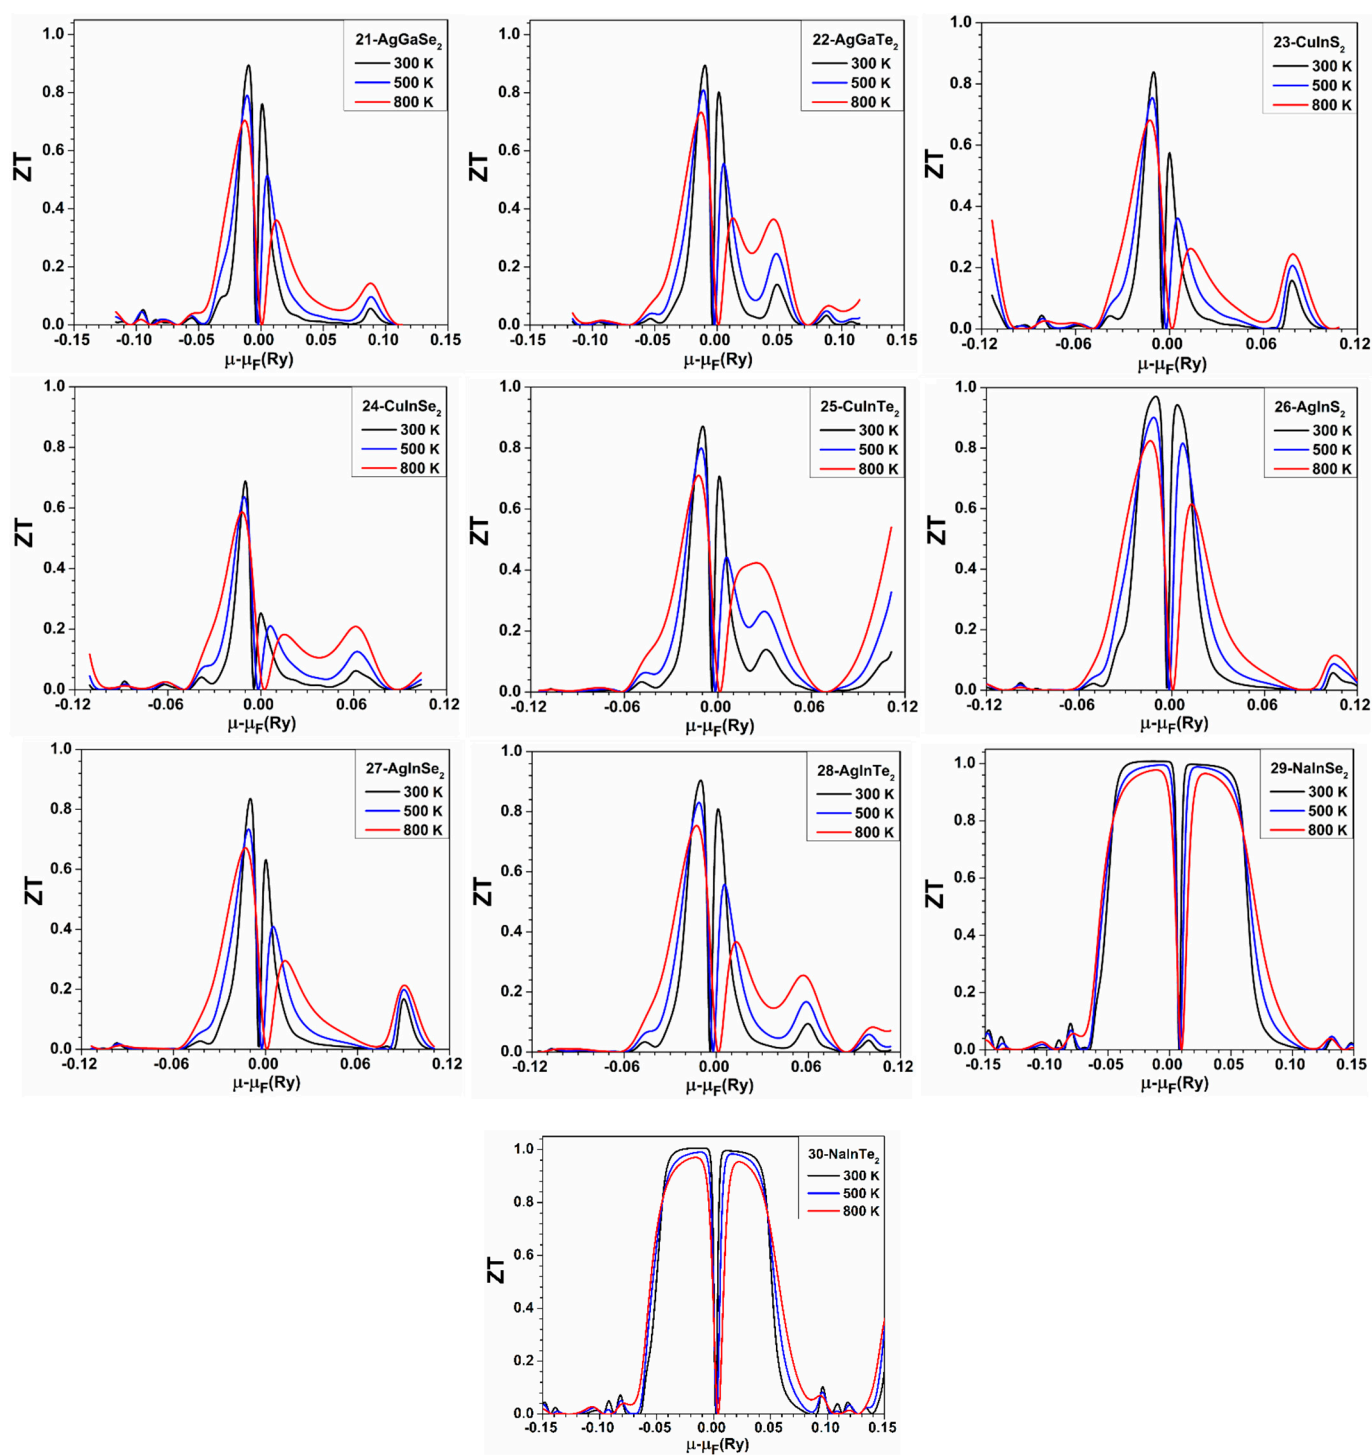

Figure S7. Calculated ZT versus the chemical potential.

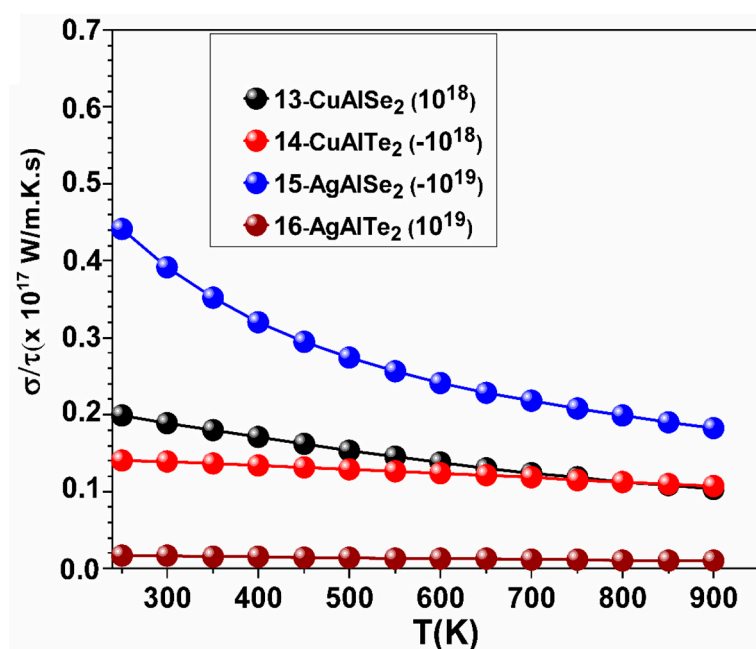Figure S8. Calculated  $\sigma/\tau$  versus the temperature for the crystals 13–16.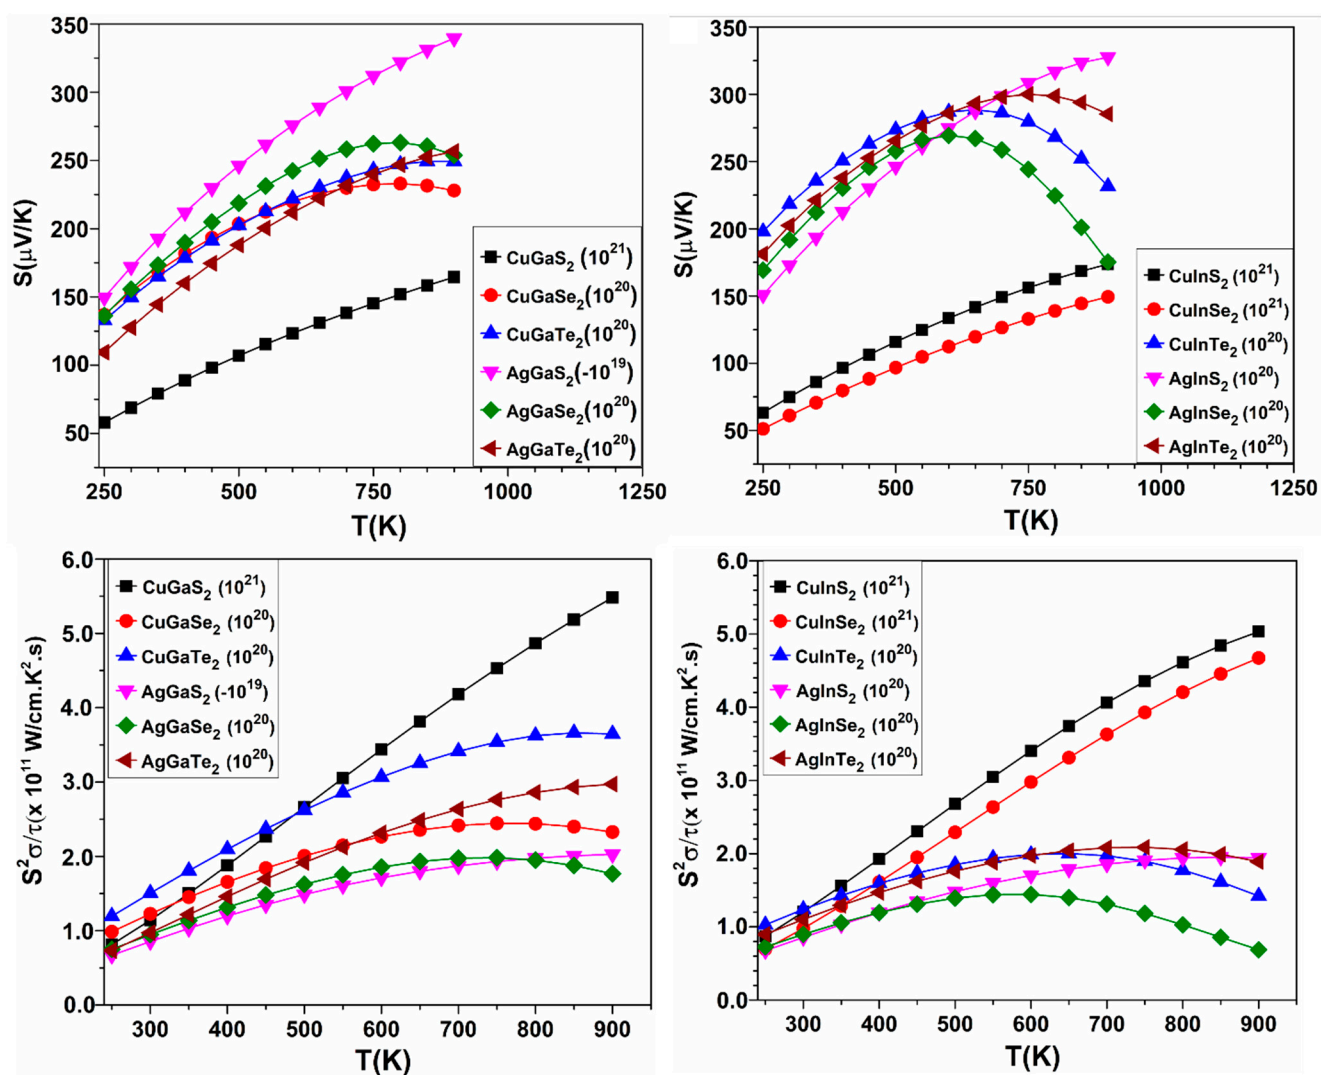Figure S9. Calculated  $S$  and  $PF$  versus the temperature for the crystals from 17 to 30.

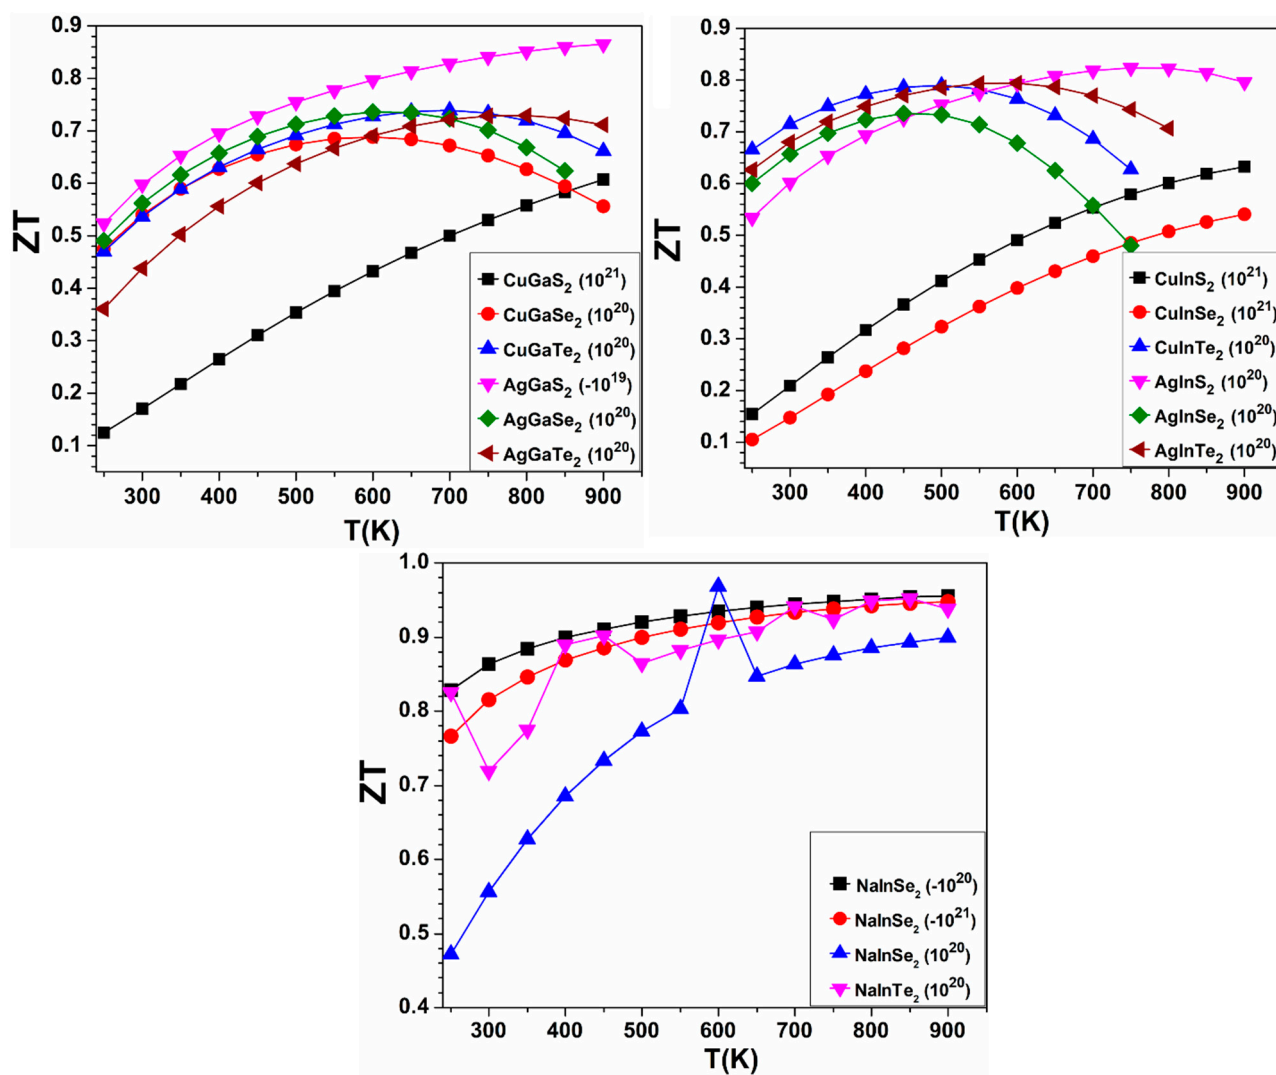

Figure S10. Calculated  $ZT$  versus the temperature for the crystals from 17 to 30.

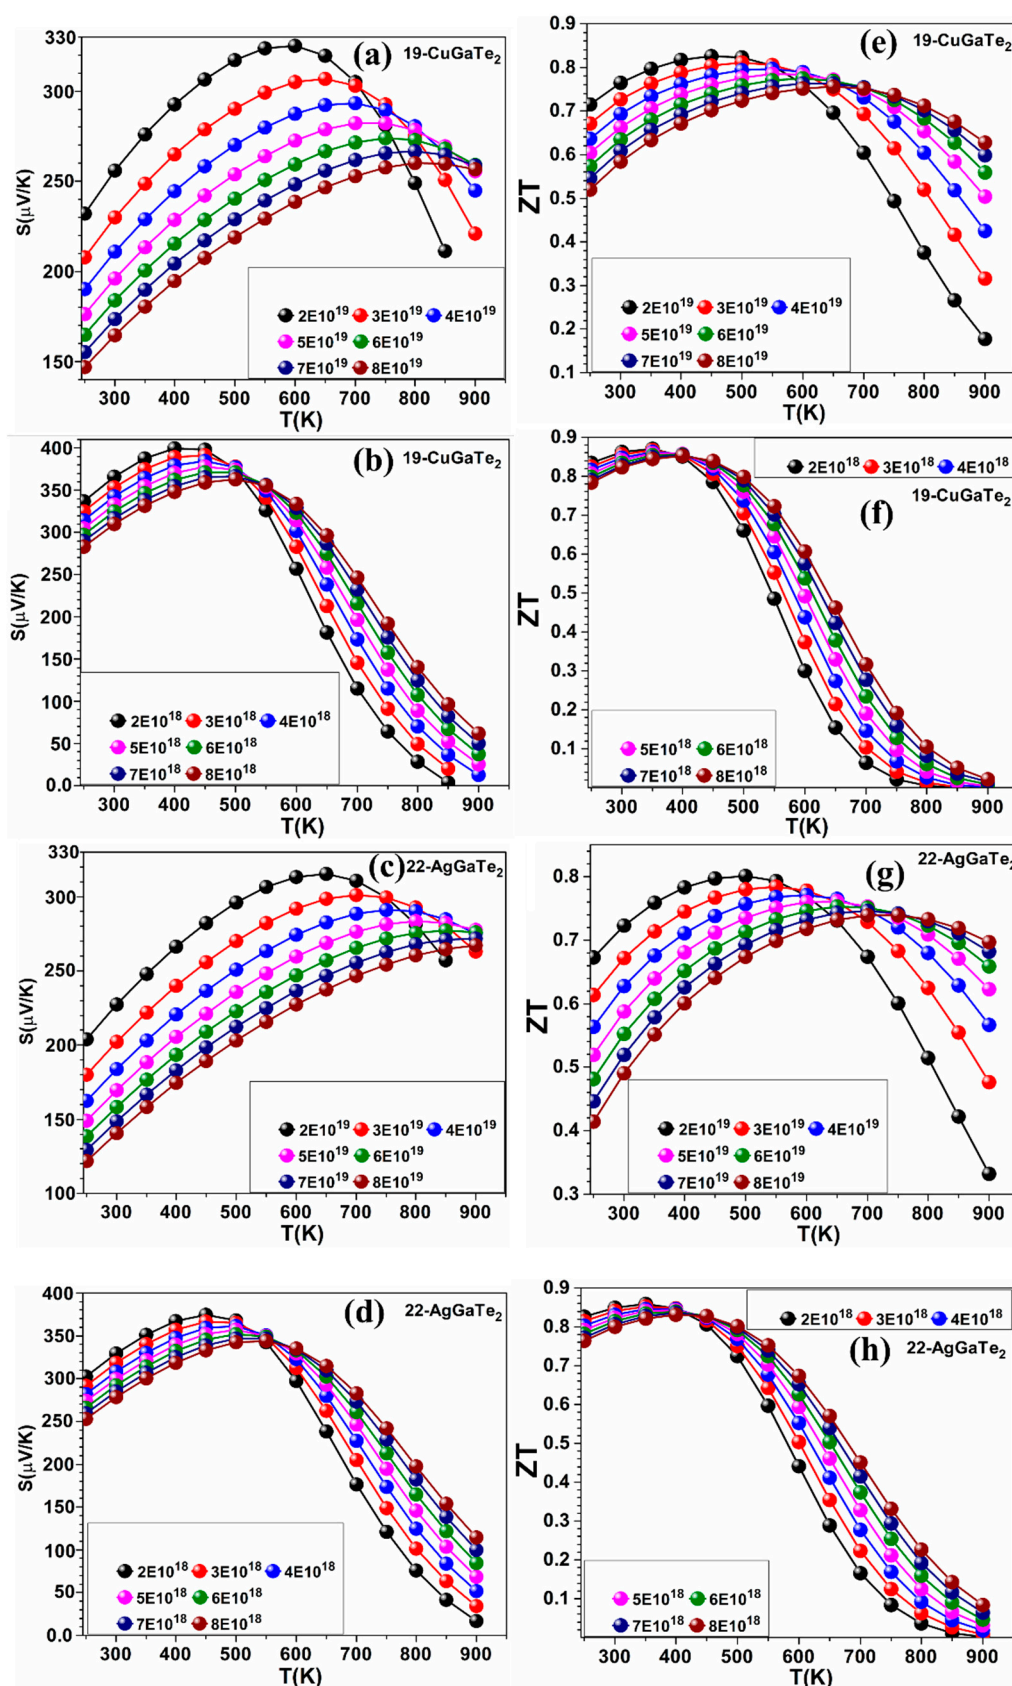

**Figure S11.**  $S$  and  $ZT$  versus the temperature for the crystals: (a,b,e,f) are for 19-CuGaTe<sub>2</sub> crystal, and (c,d,g,h) are for 22-AgGaTe<sub>2</sub> crystal at two different ranges of  $n$ .

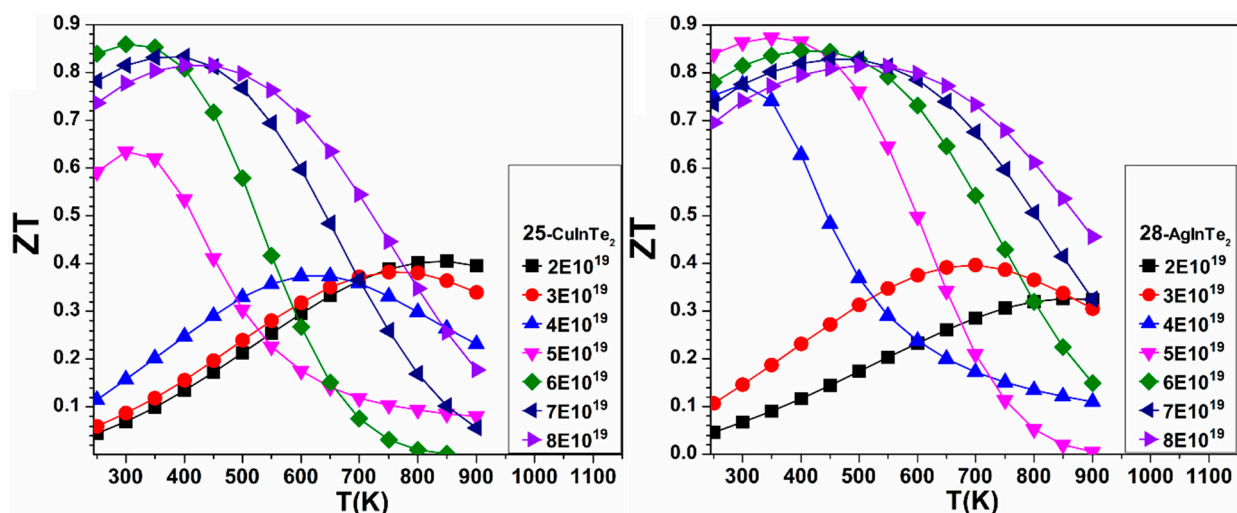

Figure S12. Shows our results for ZT versus temperature at range of  $n$ : ( $+2 \times 10^{19}$ ,  $+8 \times 10^{19}$  in  $\text{e}/\text{cm}^3$ ) for the crystals 25-CuInTe<sub>2</sub> and 28-AgInTe<sub>2</sub>

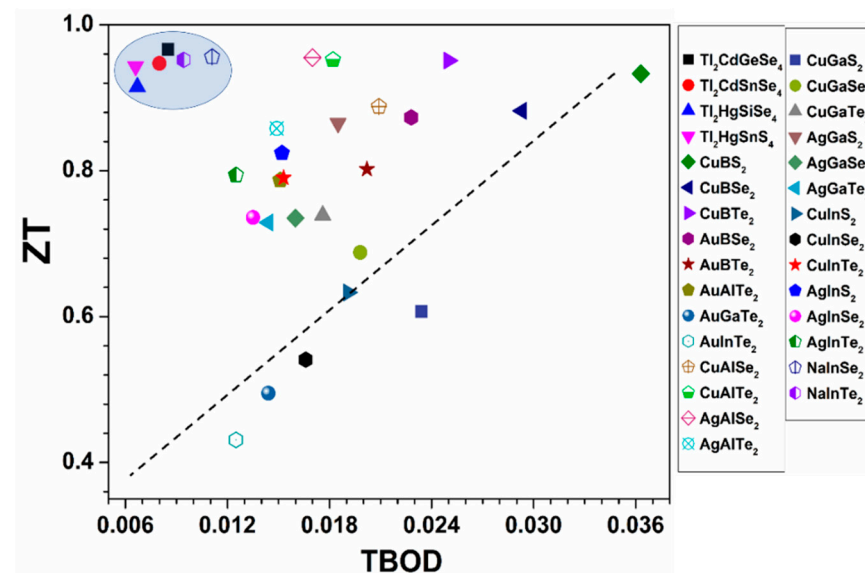

Figure S13. Calculated TBOD versus ZT for the 30 crystals.

## References

- Selezen, A.; Oleksyuk, I.; Myronchuk, G.; Smitiukh, O.; Piskach, L. Synthesis and structure of the new semiconductor compounds  $\text{Ti}_2\text{BiIVX}_4$  (Bi—Cd, Hg; DIV—Si, Ge; X—Se, Te) and isothermal sections of the  $\text{Ti}_2\text{Se—CdSe—Ge (Sn) Se}_2$  systems at 570 K. *Journal of Solid State Chemistry* **2020**, *121*, 121422.
- Mozolyuk, M.Y.; Piskach, L.; Fedorchuk, A.; Oleksyuk, I.; Parasyuk, O. Physico-chemical interaction in the  $\text{Ti}_2\text{Se—HgSe—DIVSe}_2$  systems (DIV—Si, Sn). *Materials Research Bulletin* **2012**, *47*, 3830–3834.
- Lavrentyev, A.; Gabrelian, B.; Vu, T.V.; Ananchenko, L.; Myronchuk, G.; Parasyuk, O.; Tkach, V.; Kopylova, K.; Khyzhun, O. Electronic and optical properties of quaternary sulfide  $\text{Ti}_2\text{HgSnS}_4$ , a promising optoelectronic semiconductor: A combined experimental and theoretical study. *Optical Materials* **2019**, *92*, 294–302.
- Bagci, S.; Yalcin, B.G.; Aliabad, H.R.; Duman, S.; Salmankurt, B. Structural, electronic, optical, vibrational and transport properties of  $\text{CuBX}_2$  (X = S, Se, Te) chalcopyrites. *RSC advances* **2016**, *6*, 59527–59540.
- Yaseen, M.S.; Sun, J.; Fang, H.; Murtaza, G.; Sholl, D.S. First-principles study of electronic and optical properties of ternary compounds  $\text{AuBX}_2$  (X = S, Se, Te) and  $\text{AuMTe}_2$  (M = Al, In, Ga). *Solid State Sciences* **2021**, *111*, 106508.
- Gudelli, V.K.; Kanchana, V.; Vaitheeswaran, G.  $\text{CuAlTe}_2$ : A promising bulk thermoelectric material. *Journal of Alloys and Compounds* **2015**, *648*, 958–965.
- Dongho Nguimdo, G.; Joubert, D.P. A density functional (PBE, PBEsol, HSE06) study of the structural, electronic and optical properties of the ternary compounds  $\text{AgAlX}_2$  (X = S, Se, Te). *The European Physical Journal B* **2015**, *88*, 1–10.

8. Asokamani, R.; Amirthakumari, R.; Rita, R.; Ravi, C. Electronic structure calculations and physical properties of ABX<sub>2</sub> (A = Cu, Ag; B = Ga, In; X = S, Se, Te) ternary chalcopyrite systems. *physica status solidi (b)* **1999**, *213*, 349–363.
9. Yaseen, M.S.; Murtaza, G.; Murtaza, G. Theoretical investigation of the structural stabilities, optoelectronic and thermoelectric properties of ternary alloys N a I n Y <sub>2</sub> (Y = S, S e and T e) through modified Becke–Johnson exchange potential. *International Journal of Modern Physics B* **2020**, *34*, 2050133.
10. Yusufu, A.; Kurosaki, K.; Kosuga, A.; Sugahara, T.; Ohishi, Y.; Muta, H.; Yamanaka, S. Thermoelectric properties of Ag<sub>1-x</sub>GaTe<sub>2</sub> with chalcopyrite structure. *Applied Physics Letters* **2011**, *99*, 061902.
11. Gui, Y.; Ye, L.; Jin, C.; Zhang, J.; Wang, Y. The nature of the high thermoelectric properties of CuInX<sub>2</sub> (X = S, Se and Te): First-principles study. *Applied Surface Science* **2018**, *458*, 564–571.
12. Kucek, V.; Drasar, C.; Navratil, J.; Plechacek, T.; Benes, L. Thermoelectric properties of Ni-doped CuInTe<sub>2</sub>. *Journal of Physics and Chemistry of Solids* **2015**, *83*, 18–23.
13. Yang, J.; Fan, Q.; Cheng, X. Prediction for electronic, vibrational and thermoelectric properties of chalcopyrite AgX (X = In, Ga) Te<sub>2</sub>: PBE+ U approach. *Royal Society open science* **2017**, *4*, 170750.
14. Aikebaier, Y.; Kurosaki, K.; Sugahara, T.; Ohishi, Y.; Muta, H.; Yamanaka, S. High-temperature thermoelectric properties of non-stoichiometric Ag<sub>1-x</sub>InTe<sub>2</sub> with chalcopyrite structure. *Materials Science and Engineering: B* **2012**, *177*, 999–1002.
